# Supplementary material for: Effects of different biomass materials as a salt-isolation layer on water and salt migration in coastal saline soil
Source: PeerJ. 2021 Jul 7;9:e11766. doi: 10.7717/peerj.11766 (PMC8272462; doi:10.7717/peerj.11766)
Supplement: Supplemental Information 1 [file peerj-09-11766-s001.xlsx]

## Sheet: Water infiltration test
Water infiltration test
CK											P6											P3											B3											B3
Time (min)	Marriotte’s bottle (cm)			Wetting front migration (cm)			Cumulative infiltration (cm)				Time (min)	Marriotte’s bottle (cm)			Wetting front migration (cm)			Cumulative infiltration (cm)				Time (min)	Marriotte’s bottle (cm)			Wetting front migration (cm)			Cumulative infiltration (cm)				Time (min)	Marriotte’s bottle (cm)			Wetting front migration (cm)			Cumulative infiltration (cm)				Time (min)	Marriotte’s bottle (cm)			Wetting front migration (cm)
	Sample 1	Sample 2	Sample 3	Sample 1	Sample 2	Sample 3	Sample 1	Sample 2	Sample 3			Sample 1	Sample 2	Sample 3	Sample 1	Sample 2	Sample 3	Sample 1	Sample 2	Sample 3			Sample 1	Sample 2	Sample 3	Sample 1	Sample 2	Sample 3	Sample 1	Sample 2	Sample 3			Sample 1	Sample 2	Sample 3	Sample 1	Sample 2	Sample 3	Sample 1	Sample 2	Sample 3			Sample 1	Sample 2	Sample 3	Sample 1	Sample 2
0	36.1	31	40	0	0	0	0	0	0		0	31.5	34	36	0	0	0	0	0	0		0	33.1	35	35.8	0	0	0	0	0	0		0	33.6	35	36.5	0	0	0	0	0	0		0	29.9	32	33	0	0
0.5	35.4	30	39.6	1.5	1.7	1.3	0.67228	0.9604	0.38416		0.5	30.2	32.4	35	1.8	2	1.6	1.24852	1.53664	0.9604		0.5	32	33.6	35	1.4	1.6	1.2	1.05644	1.34456	0.76832		0.5	32.7	33.8	35.9	1.7	1.9	1.5	0.86436	1.15248	0.57624		0.5	29.1	30.9	32.5124	1.3	1.6
1	35	29.8	39	2.1	2.3	1.9	1.05644	1.15248	0.9604		1	29.8	32.2	34.4	2.3	2.5	2.1	1.63268	1.72872	1.53664		1	31.8	33.6	34.6	1.9	2.1	1.7	1.24852	1.34456	1.15248		1	32.4	33.7	35.4	2.3	2.5	2.1	1.15248	1.24852	1.05644		1	29	30.8	32.4124	2	2.3
1.5	34.8	29.5	38.9	2.6	2.8	2.4	1.24852	1.4406	1.05644		1.5	29.6	31.9	34.3	2.8	3	2.6	1.82476	2.01684	1.63268		1.5	31.6	33.3	34.5	2.4	2.6	2.2	1.4406	1.63268	1.24852		1.5	32	33.2	35.1	2.8	3	2.6	1.53664	1.72872	1.34456		1.5	28.9	30.6	32.4165	2.5	2.9
2	34.7	29.3	38.9	3	3.2	2.8	1.34456	1.63268	1.05644		2	29.5	31.7	34.3	3.1	3.3	2.9	1.9208	2.20892	1.63268		2	31.4	33	34.4	2.8	3	2.6	1.63268	1.9208	1.34456		2	31.8	32.9	35	3.2	3.4	3	1.72872	2.01684	1.4406		2	28.7	30.4	32.2165	2.8	3.2
2.5	34.5	29.1	38.7	3.4	3.5	3.3	1.53664	1.82476	1.24852		2.5	29.4	31.6	34.2	3.5	3.6	3.4	2.01684	2.30496	1.72872		2.5	31.2	32.8	34.2	3.1	3.2	3	1.82476	2.11288	1.53664		2.5	31.7	32.8	34.9	3.4	3.5	3.3	1.82476	2.11288	1.53664		2.5	28.6	30.2	32.2206	3	3.5
3	34.4	28.9	38.7	3.7	3.9	3.5	1.63268	2.01684	1.24852		3	29.3	31.4	34.2	3.7	3.9	3.5	2.11288	2.49704	1.72872		3	31.1	32.6	34.2	3.4	3.6	3.2	1.9208	2.30496	1.53664		3	31.5	32.5	34.8	3.5	3.7	3.3	2.01684	2.401	1.63268		3	28.5	30.1	32.1206	3.4	3.9
3.5	34.3	28.9	38.5	3.9	4	3.8	1.72872	2.01684	1.4406		3.5	29.2	31.4	34	4	4.1	3.9	2.20892	2.49704	1.9208		3.5	31	32.6	34	3.6	3.7	3.5	2.01684	2.30496	1.72872		3.5	31.3	32.4	34.5	4	4.1	3.9	2.20892	2.49704	1.9208		3.5	28.4	30.1	31.9165	3.7	4.1
4	34.2	28.7	38.5	4.2	4.3	4.1	1.82476	2.20892	1.4406		4	29.1	31.2	34	4.3	4.4	4.2	2.30496	2.68912	1.9208		4	31	32.5	34.1	3.7	3.8	3.6	2.01684	2.401	1.63268		4	31.2	32.2	34.5	4.1	4.2	4	2.30496	2.68912	1.9208		4	28.3	29.9	31.9206	4	4.5
4.5	34.1	28.7	38.3	4.3	4.4	4.2	1.9208	2.20892	1.63268		4.5	29	31.2	33.8	4.5	4.6	4.4	2.401	2.68912	2.11288		4.5	30.9	32.5	33.9	3.8	3.9	3.7	2.11288	2.401	1.82476		4.5	31.1	32.2	34.3	4.4	4.5	4.3	2.401	2.68912	2.11288		4.5	28.2	30	31.6124	4.2	4.5
5	34	28.7	38.1	4.4	4.6	4.2	2.01684	2.20892	1.82476		5	29	31.3	33.7	4.7	4.9	4.5	2.401	2.59308	2.20892		5	30.8	32.5	33.7	3.9	4.1	3.7	2.20892	2.401	2.01684		5	30.9	32.1	34	4.6	4.8	4.4	2.59308	2.78516	2.401		5	28.1	29.8	31.6165	4.5	4.9
6	33.8	28.6	37.8	4.6	4.9	4.3	2.20892	2.30496	2.11288		6	28.8	31.2	33.4	4.9	5.2	4.6	2.59308	2.68912	2.49704		6	30.7	32.5	33.5	4.2	4.5	3.9	2.30496	2.401	2.20892		6	30.5	31.8	33.5	4.9	5.2	4.6	2.97724	3.07328	2.8812		6	27.8	29.4	31.4206	4.9	5.4
7	33.7	28.4	37.8	5.2	5.4	5	2.30496	2.49704	2.11288		7	28.6	30.9	33.3	5.4	5.6	5.2	2.78516	2.97724	2.59308		7	30.5	32.2	33.4	4.8	5	4.6	2.49704	2.68912	2.30496		7	30.35	31.5	33.5	5.4	5.6	5.2	3.1213	3.3614	2.8812		7	27.6	29.1	31.3247	5.1	5.7
8	33.5	28.1	37.7	5.6	5.7	5.5	2.49704	2.78516	2.20892		8	28.5	30.7	33.3	5.6	5.7	5.5	2.8812	3.16932	2.59308		8	30.4	32	33.4	5.2	5.3	5.1	2.59308	2.8812	2.30496		8	30.3	31.4	33.5	5.7	5.8	5.6	3.16932	3.45744	2.8812		8	27.5	28.9	31.3289	5.3	6
9	33.4	28.1	37.5	5.9	6	5.8	2.59308	2.78516	2.401		9	28.4	30.7	33.1	5.8	5.9	5.7	2.97724	3.16932	2.78516		9	30.3	32	33.2	5.5	5.6	5.4	2.68912	2.8812	2.49704		9	30.2	31.4	33.3	6.2	6.3	6.1	3.26536	3.45744	3.07328		9	27.4	28.9	31.1247	5.4	6
10	33.3	27.9	37.5	6.2	6.4	6	2.68912	2.97724	2.401		10	28.3	30.5	33.1	6	6.2	5.8	3.07328	3.3614	2.78516		10	30.2	31.8	33.2	5.7	5.9	5.5	2.78516	3.07328	2.49704		10	30.1	31.2	33.3	6.5	6.7	6.3	3.3614	3.64952	3.07328		10	27.3	28.9	30.9206	5.8	6.3
12	33.1	27.8	37.2	6.5	6.7	6.3	2.8812	3.07328	2.68912		12	28.1	30.4	32.8	6.5	6.7	6.3	3.26536	3.45744	3.07328		12	30	31.7	32.9	6.3	6.5	6.1	2.97724	3.16932	2.78516		12	29.85	31	33	7.1	7.3	6.9	3.6015	3.8416	3.3614		12	27.1	28.7	30.7206	6.5	7
14	33	27.8	37	7.2	7.4	7	2.97724	3.07328	2.8812		14	28	30.4	32.6	7.1	7.3	6.9	3.3614	3.45744	3.26536		14	29.8	31.6	32.6	6.8	7	6.6	3.16932	3.26536	3.07328		14	29.6	30.9	32.6	7.6	7.8	7.4	3.8416	3.93764	3.74556		14	27	28.7	30.5165	6.9	7.3
16	32.8	27.5	36.9	7.6	7.8	7.4	3.16932	3.3614	2.97724		16	27.8	30.1	32.5	7.6	7.8	7.4	3.55348	3.74556	3.3614		16	29.6	31.3	32.5	7.3	7.5	7.1	3.3614	3.55348	3.16932		16	29.5	30.7	32.6	8	8.2	7.8	3.93764	4.12972	3.74556		16	26.9	28.7	30.3124	7.2	7.5
18	32.7	27.3	36.9	8.2	8.3	8.1	3.26536	3.55348	2.97724		18	27.7	29.9	32.5	8.1	8.2	8	3.64952	3.93764	3.3614		18	29.5	31.1	32.5	7.7	7.8	7.6	3.45744	3.74556	3.16932		18	29.3	30.4	32.5	8.5	8.6	8.4	4.12972	4.41784	3.8416		18	26.8	28.6	30.2124	7.5	7.8
20	32.5	27.2	36.6	8.7	8.9	8.5	3.45744	3.64952	3.26536		20	27.5	29.8	32.2	8.5	8.7	8.3	3.8416	4.03368	3.64952		20	29.4	31.1	32.3	8	8.2	7.8	3.55348	3.74556	3.3614		20	29.2	30.4	32.3	8.9	9.1	8.7	4.22576	4.41784	4.03368		20	26.6	28.3	30.1165	7.9	8.3
22	32.3	27	36.5	9.1	9.2	9	3.64952	3.8416	3.3614		22	27.4	29.6	32.2	8.8	8.9	8.7	3.93764	4.22576	3.64952		22	29.2	30.8	32.2	8.5	8.6	8.4	3.74556	4.03368	3.45744		22	29.1	30.2	32.3	9.3	9.4	9.2	4.3218	4.60992	4.03368		22	26.5	28.2	30.0165	8.3	8.7
24	32.1	26.9	36.3	9.5	9.6	9.4	3.8416	3.93764	3.55348		24	27.3	29.5	32.1	9.2	9.3	9.1	4.03368	4.3218	3.74556		24	29	30.6	32	9	9.1	8.9	3.93764	4.22576	3.64952		24	28.9	30	32.1	9.6	9.7	9.5	4.51388	4.802	4.22576		24	26.4	28	30.0206	8.7	9.2
26	32	26.8	36	10	10.1	9.9	3.93764	4.03368	3.8416		26	27.1	29.5	31.7	9.6	9.7	9.5	4.22576	4.3218	4.12972		26	28.9	30.7	31.7	9.4	9.5	9.3	4.03368	4.12972	3.93764		26	28.7	30	31.7	10	10.1	9.9	4.70596	4.802	4.60992		26	26.2	27.8	29.8206	9.1	9.6
28	31.9	26.6	36	10.3	10.5	10.1	4.03368	4.22576	3.8416		28	27	29.3	31.7	10	10.2	9.8	4.3218	4.51388	4.12972		28	28.8	30.5	31.7	9.8	10	9.6	4.12972	4.3218	3.93764		28	28.6	29.8	31.7	10.5	10.7	10.3	4.802	4.99408	4.60992		28	26.1	27.8	29.6165	9.4	9.8
30	31.8	26.4	36	10.6	10.9	10.3	4.12972	4.41784	3.8416		30	26.9	29.1	31.7	10.4	10.7	10.1	4.41784	4.70596	4.12972		30	28.7	30.3	31.7	10.2	10.5	9.9	4.22576	4.51388	3.93764		30	28.5	29.6	31.7	11	11.3	10.7	4.89804	5.18616	4.60992		30	26	27.6	29.6206	9.6	10.1
33	31.6	26.2	35.8	11.2	11.4	11	4.3218	4.60992	4.03368		33	26.6	28.8	31.4	10.9	11.1	10.7	4.70596	4.99408	4.41784		33	28.5	30.1	31.5	10.6	10.8	10.4	4.41784	4.70596	4.12972		33	28.3	29.4	31.5	11.5	11.7	11.3	5.09012	5.37824	4.802		33	25.8	27.6	29.2124	10	10.3
36	31.4	25.9	35.7	11.6	11.7	11.5	4.51388	4.89804	4.12972		36	26.4	28.5	31.3	11.4	11.5	11.3	4.89804	5.2822	4.51388		36	28.3	29.8	31.4	11.1	11.2	11	4.60992	4.99408	4.22576		36	28	29	31.3	12	12.1	11.9	5.37824	5.7624	4.99408		36	25.6	27.3	29.1165	10.5	10.9
39	31.2	25.8	35.4	12.1	12.2	12	4.70596	4.99408	4.41784		39	26.2	28.4	31	11.9	12	11.8	5.09012	5.37824	4.802		39	28.1	29.7	31.1	11.6	11.7	11.5	4.802	5.09012	4.51388		39	27.9	29	31.1	12.5	12.6	12.4	5.47428	5.7624	5.18616		39	25.5	27.1	29.1206	10.9	11.4
42	31	25.5	35.3	12.5	12.7	12.3	4.89804	5.2822	4.51388		42	26.1	28.2	31	12.3	12.5	12.1	5.18616	5.57032	4.802		42	27.9	29.4	31	12.1	12.3	11.9	4.99408	5.37824	4.60992		42	27.5	28.5	30.8	12.9	13.1	12.7	5.85844	6.2426	5.47428		42	25.4	26.9	29.1247	11.3	11.9
46	30.8	25.4	35	13.1	13.3	12.9	5.09012	5.37824	4.802		46	25.9	28.1	30.7	12.8	13	12.6	5.37824	5.66636	5.09012		46	27.7	29.3	30.7	12.6	12.8	12.4	5.18616	5.47428	4.89804		46	27.4	28.5	30.6	13.4	13.6	13.2	5.95448	6.2426	5.66636		46	25.2	26.6	29.0289	12	12.7
50	30.5	25.2	34.6	13.6	13.8	13.4	5.37824	5.57032	5.18616		50	25.6	27.9	30.3	13.2	13.4	13	5.66636	5.85844	5.47428		50	27	28.7	29.9	13.2	13.4	13	5.85844	6.05052	5.66636		50	27.3	28.5	30.4	14	14.2	13.8	6.05052	6.2426	5.85844		50	25	26.5	28.7247	12.5	13.1
55	30.2	25	34.2	14.2	14.4	14	5.66636	5.7624	5.57032		55	25.4	27.8	30	13.9	14.1	13.7	5.85844	5.95448	5.7624		55	27.2	29	30	13.9	14.1	13.7	5.66636	5.7624	5.57032		55	27	28.3	30	14.6	14.8	14.4	6.33864	6.43468	6.2426		55	24.7	26.3	28.3206	13	13.5
60	30	24.7	34.1	14.9	15	14.8	5.85844	6.05052	5.66636		60	25.1	27.4	29.8	14.5	14.6	14.4	6.14656	6.33864	5.95448		60	26.9	28.6	29.8	14.4	14.5	14.3	5.95448	6.14656	5.7624		60	26.7	27.9	29.8	15.1	15.2	15	6.62676	6.81884	6.43468		60	24.5	26.1	28.1206	13.6	14.1
65	29.7	24.3	33.9	15.7	15.9	15.5	6.14656	6.43468	5.85844		65	24.9	27.1	29.7	15.3	15.5	15.1	6.33864	6.62676	6.05052		65	26.6	28.2	29.6	14.8	15	14.6	6.2426	6.53072	5.95448		65	26.4	27.5	29.6	15.7	15.9	15.5	6.91488	7.203	6.62676		65	24.3	26	27.8165	14.1	14.5
70	29.5	24.2	33.6	16	16.1	15.9	6.33864	6.53072	6.14656		70	24.6	26.9	29.3	16	16.1	15.9	6.62676	6.81884	6.43468		70	26.4	28.1	29.3	15.5	15.6	15.4	6.43468	6.62676	6.2426		70	26.3	27.5	29.4	16.3	16.4	16.2	7.01092	7.203	6.81884		70	24.1	25.9	27.5124	14.6	14.9
75	29.2	23.8	33.4	16.5	16.6	16.4	6.62676	6.91488	6.33864		75	24.4	26.6	29.2	16.5	16.6	16.4	6.81884	7.10696	6.53072		75	26.2	27.8	29.2	15.8	15.9	15.7	6.62676	6.91488	6.33864		75	25.9	27	29.1	16.8	16.9	16.7	7.39508	7.6832	7.10696		75	23.9	25.7	27.3124	15.2	15.5
80	29	23.7	33.1	16.9	17	16.8	6.81884	7.01092	6.62676		80	24.2	26.5	28.9	17	17.1	16.9	7.01092	7.203	6.81884		80	26	27.7	28.9	16.1	16.2	16	6.81884	7.01092	6.62676		80	25.8	27	28.9	17.4	17.5	17.3	7.49112	7.6832	7.29904		80	23.7	25.4	27.2165	15.8	16.2
85	28.9	23.6	32.9	17.6	17.8	17.4	6.91488	7.10696	6.81884		85	24	26.4	28.6	17.4	17.6	17.2	7.203	7.29904	7.10696		85	25.8	27.6	28.6	16.9	17.1	16.7	7.01092	7.10696	6.91488		85	25.6	26.9	28.6	17.7	17.9	17.5	7.6832	7.77924	7.58716		85	23.4	25.1	26.9165	16.2	16.6
90	28.6	23.3	32.7	18.2	18.5	17.9	7.203	7.39508	7.01092		90	23.8	26.1	28.5	18	18.3	17.7	7.39508	7.58716	7.203		90	25.6	27.3	28.5	17.5	17.8	17.2	7.203	7.39508	7.01092		90	25.4	26.6	28.5	18.4	18.7	18.1	7.87528	8.06736	7.6832		90	23.2	24.8	26.8206	16.7	17.2
95	28.4	23	32.6	18.7	18.9	18.5	7.39508	7.6832	7.10696		95	23.6	25.8	28.4	18.5	18.7	18.3	7.58716	7.87528	7.29904		95	25.4	27	28.4	18	18.2	17.8	7.39508	7.6832	7.10696		95	25.3	26.4	28.5	19.2	19.4	19	7.97132	8.25944	7.6832		95	23	24.6	26.6206	17.2	17.7
100	28.2	22.9	32.3	19.3	19.4	19.2	7.58716	7.77924	7.39508		100	23.4	25.7	28.1	18.9	19	18.8	7.77924	7.97132	7.58716		100	25.2	26.9	28.1	18.5	18.6	18.4	7.58716	7.77924	7.39508		100	25	26.2	28.1	19.3	19.4	19.2	8.25944	8.45152	8.06736		100	22.8	24.5	26.3165	17.7	18.1
105	28	22.6	32.2	19.8	19.9	19.7	7.77924	8.06736	7.49112		105	23.2	25.4	28	19.5	19.6	19.4	7.97132	8.25944	7.6832		105	25	26.6	28	19	19.1	18.9	7.77924	8.06736	7.49112		105	24.7	25.8	27.9	19.8	19.9	19.7	8.54756	8.83568	8.25944		105	22.6	24.2	26.2206	18.2	18.7
110	27.8	22.4	32	20.2	20.5	19.9	7.97132	8.25944	7.6832		110	23	25.1	27.9	20	20.3	19.7	8.1634	8.54756	7.77924		110	24.8	26.3	27.9	19.5	19.8	19.2	7.97132	8.35548	7.58716		110	24.6	25.6	27.9	20.2	20.5	19.9	8.6436	9.02776	8.25944		110	22.5	24.3	25.9124	18.6	18.9
115	27.7	22.5	31.7	20.6	21	20.2	8.06736	8.1634	7.97132		115	22.8	25	27.6	20.3	20.7	19.9	8.35548	8.6436	8.06736		115	24.6	26.2	27.6	19.8	20.2	19.4	8.1634	8.45152	7.87528		115	24.5	25.6	27.7	20.4	20.8	20	8.73964	9.02776	8.45152		115	22.3	24	25.8165	18.9	19.3
120	27.4	22.1	31.5	21	21.2	20.8	8.35548	8.54756	8.1634		120	22.6	24.8	27.4	20.5	20.7	20.3	8.54756	8.83568	8.25944		120	24.5	26.1	27.5	20.1	20.3	19.9	8.25944	8.54756	7.97132		120	24.4	25.5	27.6	20.5	20.7	20.3	8.83568	9.1238	8.54756		120	22.2	23.8	25.8206	19.3	19.8
125	27	21.6	31.2	21.5	21.8	21.2	8.73964	9.02776	8.45152		125	22.5	24.6	27.4	20.7	21	20.4	8.6436	9.02776	8.25944		125	24.3	25.8	27.4	20.3	20.6	20	8.45152	8.83568	8.06736		125	24.3	25.3	27.6	20.6	20.9	20.3	8.93172	9.31588	8.54756		125	22	23.5	25.7247	19.7	20.3
130	26.8	21.4	31	22.2	22.4	22	8.93172	9.21984	8.6436		130	22.4	24.4	27.4	20.7	20.9	20.5	8.73964	9.21984	8.25944		130	24.1	25.5	27.3	20.4	20.6	20.2	8.6436	9.1238	8.1634		130	24.2	25.1	27.6	20.9	21.1	20.7	9.02776	9.50796	8.54756		130	21.9	23.3	25.7289	20	20.7
140	26.6	21.1	30.9	22.9	23.1	22.7	9.1238	9.50796	8.73964		140	22.3	24.4	27.2	20.8	21	20.6	8.83568	9.21984	8.45152		140	23.9	25.4	27	20.6	20.8	20.4	8.83568	9.21984	8.45152		140	24.1	25.1	27.4	21.2	21.4	21	9.1238	9.50796	8.73964		140	21.9	23.4	25.6247	20.2	20.8
150	26.4	21	30.6	23.6	24	23.2	9.31588	9.604	9.02776		150	22.3	24.5	27.1	20.8	21.2	20.4	8.83568	9.1238	8.54756		150	23.8	25.4	26.8	20.9	21.3	20.5	8.93172	9.21984	8.6436		150	24	25.1	27.2	21.5	21.9	21.1	9.21984	9.50796	8.93172		150	21.8	23.4	25.4206	20.5	21
160	26.2	20.7	30.5	24.3	24.4	24.2	9.50796	9.89212	9.1238		160	22.3	24.6	27	20.9	21	20.8	8.83568	9.02776	8.6436		160	23.8	25.5	26.7	21	21.1	20.9	8.93172	9.1238	8.73964		160	24	25.2	27.1	21.9	22	21.8	9.21984	9.41192	9.02776		160	21.8	23.4	25.4206	20.8	21.3
170	25.9	20.5	30.1	24.8	25.1	24.5	9.79608	10.0842	9.50796		170	22.3	24.5	27.1	21	21.3	20.7	8.83568	9.1238	8.54756		170	23.8	25.4	26.8	21.2	21.5	20.9	8.93172	9.21984	8.6436		170	24	25.1	27.2	22.4	22.7	22.1	9.21984	9.50796	8.93172		170	21.7	23.4	25.2165	21.2	21.6
180	25.6	20.3	29.7	25.6	26.1	25.1	10.0842	10.2763	9.89212		180	22.3	24.6	27	21.1	21.6	20.6	8.83568	9.02776	8.6436		180	23.6	25.3	26.5	21.4	21.9	20.9	9.1238	9.31588	8.93172		180	23.9	25.1	27	22.7	23.2	22.2	9.31588	9.50796	9.1238		180	21.6	23.2	25.2206	21.5	22
190	25.4	20.2	29.4	26.3	26.6	26	10.2763	10.3723	10.1802		190	22.2	24.6	26.8	21.2	21.5	20.9	8.93172	9.02776	8.83568		190	23.6	25.4	26.4	21.5	21.8	21.2	9.1238	9.21984	9.02776		190	23.8	25.1	26.8	23.1	23.4	22.8	9.41192	9.50796	9.31588		190	21.6	23.1	25.3247	21.6	22.2
200	25.1	19.8	29.2	26.9	27.1	26.7	10.5644	10.7565	10.3723		200	22.1	24.4	26.8	21.3	21.5	21.1	9.02776	9.21984	8.83568		200	23.5	25.2	26.4	21.7	21.9	21.5	9.21984	9.41192	9.02776		200	23.8	25	26.9	23.6	23.8	23.4	9.41192	9.604	9.21984		200	21.5	22.9	25.3289	21.7	22.4
210	24.8	19.4	29	27.5	27.8	27.2	10.8525	11.1406	10.5644		210	22.1	24.3	26.9	21.5	21.8	21.2	9.02776	9.31588	8.73964		210	23.5	25.1	26.5	21.8	22.1	21.5	9.21984	9.50796	8.93172		210	23.7	24.8	26.9	24	24.3	23.7	9.50796	9.79608	9.21984		210	21.4	22.9	25.1247	21.7	22.3
220	24.6	19.3	28.7	28.1	28.5	27.7	11.0446	11.2367	10.8525		220	22	24.1	26.9	21.7	22.1	21.3	9.1238	9.50796	8.73964		220	23.4	24.9	26.5	21.9	22.3	21.5	9.31588	9.70004	8.93172		220	23.7	24.7	27	24.3	24.7	23.9	9.50796	9.89212	9.1238		220	21.4	23	25.0206	21.8	22.3
230	24.4	19	28.6	28.6	28.8	28.4	11.2367	11.5248	10.9486		230	22	24.2	26.8	22	22.2	21.8	9.1238	9.41192	8.83568		230	23.3	24.9	26.3	22.1	22.3	21.9	9.41192	9.70004	9.1238		230	23.6	24.7	26.8	24.8	25	24.6	9.604	9.89212	9.31588		230	21.3	22.9	24.9206	21.8	22.3
240	24.1	18.8	28.2	29.3	29.6	29	11.5248	11.7169	11.3327		240	21.9	24.2	26.6	22.2	22.5	21.9	9.21984	9.41192	9.02776		240	23.3	25	26.2	22.3	22.6	22	9.41192	9.604	9.21984		240	23.5	24.7	26.6	25.1	25.4	24.8	9.70004	9.89212	9.50796		240	21.3	23	24.8165	21.9	22.3
250	23.9	18.7	27.9	30	30.2	29.8	11.7169	11.8129	11.6208		250	21.9	24.1	26.7	22.5	22.7	22.3	9.21984	9.50796	8.93172		250	23.2	24.8	26.2	22.4	22.6	22.2	9.50796	9.79608	9.21984		250	23.4	24.5	26.6	25.6	25.8	25.4	9.79608	10.0842	9.50796		250	21.2	23	24.6124	22	22.3
260	23.7	18.4	27.8	30.7	30.9	30.5	11.909	12.101	11.7169		260	21.8	24.1	26.5	22.8	23	22.6	9.31588	9.50796	9.1238		260	23.2	24.9	26.1	22.6	22.8	22.4	9.50796	9.70004	9.31588		260	23.4	24.6	26.5	25.9	26.1	25.7	9.79608	9.98816	9.604		260	21.2	23	24.6124	22	22.3
270	23.5	18.1	27.7	31.4	31.8	31	12.101	12.3892	11.8129		270	21.8	24	26.6	23	23.4	22.6	9.31588	9.604	9.02776		270	23.1	24.7	26.1	22.7	23.1	22.3	9.604	9.89212	9.31588		270	23.3	24.4	26.5	26.3	26.7	25.9	9.89212	10.1802	9.604		270	21.1	22.8	24.6165	22.1	22.5
280	23.3	18	27.4	31.9	32	31.8	12.2931	12.4852	12.101		280	21.7	24	26.4	23.3	23.4	23.2	9.41192	9.604	9.21984		280	23.1	24.8	26	22.9	23	22.8	9.604	9.79608	9.41192		280	23.2	24.4	26.3	26.7	26.8	26.6	9.98816	10.1802	9.79608		280	21	22.7	24.5165	22.2	22.6
290	23	17.6	27.2	32.4	32.7	32.1	12.5812	12.8694	12.2931		290	21.6	23.8	26.4	23.5	23.8	23.2	9.50796	9.79608	9.21984		290	23	24.6	26	23	23.3	22.7	9.70004	9.98816	9.41192		290	23.15	24.2	26.4	27	27.3	26.7	10.0362	10.3723	9.70004		290	21	22.6	24.6206	22.3	22.8
300	22.8	17.4	27	33	33.5	32.5	12.7733	13.0614	12.4852		300	21.5	23.7	26.3	23.7	24.2	23.2	9.604	9.89212	9.31588		300	23	24.6	26	23.2	23.7	22.7	9.70004	9.98816	9.41192		300	23.1	24.2	26.3	27.4	27.9	26.9	10.0842	10.3723	9.79608		300	21	22.6	24.6206	22.4	22.9
310	22.6	17.4	26.6	33.6	33.9	33.3	12.9654	13.0614	12.8694		310	21.5	23.9	26.1	24	24.3	23.7	9.604	9.70004	9.50796		310	23	24.8	25.8	23.5	23.8	23.2	9.70004	9.79608	9.604		310	23	24.3	26	27.7	28	27.4	10.1802	10.2763	10.0842		310	20.9	22.6	24.4165	22.6	23
320	22.4	17.1	26.5	34.2	34.4	34	13.1575	13.3496	12.9654		320	21.4	23.7	26.1	24.2	24.4	24	9.70004	9.89212	9.50796		320	22.9	24.6	25.8	23.6	23.8	23.4	9.79608	9.98816	9.604		320	22.9	24.1	26	28.2	28.4	28	10.2763	10.4684	10.0842		320	20.9	22.5	24.5206	22.7	23.2
330	22.3	16.9	26.5	34.7	35	34.4	13.2535	13.5416	12.9654		330	21.3	23.5	26.1	24.4	24.7	24.1	9.79608	10.0842	9.50796		330	22.9	24.5	25.9	23.8	24.1	23.5	9.79608	10.0842	9.50796		330	22.8	23.9	26	28.6	28.9	28.3	10.3723	10.6604	10.0842		330	20.8	22.6	24.2124	22.8	23.1
340	22	16.6	26.2	35.3	35.5	35.1	13.5416	13.8298	13.2535		340	21.3	23.5	26.1	24.7	24.9	24.5	9.79608	10.0842	9.50796		340	22.7	24.3	25.7	24.1	24.3	23.9	9.98816	10.2763	9.70004		340	22.8	23.9	26	29	29.2	28.8	10.3723	10.6604	10.0842		340	20.8	22.5	24.3165	22.9	23.3
350	21.8	16.3	26.1	35.8	36.1	35.5	13.7337	14.1179	13.3496		350	21.2	23.3	26.1	24.9	25.2	24.6	9.89212	10.2763	9.50796		350	22.7	24.2	25.8	24.3	24.6	24	9.98816	10.3723	9.604		350	22.7	23.7	26	29.3	29.6	29	10.4684	10.8525	10.0842		350	20.7	22.3	24.3206	23	23.5
360	21.6	16.2	25.8	36.5	36.9	36.1	13.9258	14.2139	13.6377		360	21.1	23.1	26.1	25.1	25.5	24.7	9.98816	10.4684	9.50796		360	22.6	24	25.8	24.5	24.9	24.1	10.0842	10.5644	9.604		360	22.6	23.5	26	29.8	30.2	29.4	10.5644	11.0446	10.0842		360	20.6	22.1	24.3247	23.2	23.8
370	21.5	16	25.8	37	37.2	36.8	14.0218	14.406	13.6377		370	21	23.1	25.9	25.3	25.5	25.1	10.0842	10.4684	9.70004		370	22.5	24	25.6	24.7	24.9	24.5	10.1802	10.5644	9.79608		370	22.5	23.5	25.8	30.3	30.5	30.1	10.6604	11.0446	10.2763		370	20.6	22	24.4289	23.3	24
380	21.3	15.9	25.5	37.5	37.8	37.2	14.2139	14.502	13.9258		380	21	23.2	25.8	25.5	25.8	25.2	10.0842	10.3723	9.79608		380	22.3	23.9	25.3	24.8	25.1	24.5	10.3723	10.6604	10.0842		380	22.4	23.5	25.6	30.8	31.1	30.5	10.7565	11.0446	10.4684		380	20.5	22	24.2247	23.5	24.1
400	21	15.7	25.1	38.4	38.6	38.2	14.502	14.6941	14.31		400	20.9	23.2	25.6	25.6	25.8	25.4	10.1802	10.3723	9.98816		400	22.2	23.9	25.1	25.2	25.4	25	10.4684	10.6604	10.2763		400	22.3	23.5	25.4	31.3	31.5	31.1	10.8525	11.0446	10.6604		400	20.5	22.1	24.1206	23.6	24.1
420	20.6	15.4	24.6	39.2	39.4	39	14.8862	14.9822	14.7902		420	20.8	23.2	25.4	25.7	25.9	25.5	10.2763	10.3723	10.1802		420	22	23.8	24.8	25.8	26	25.6	10.6604	10.7565	10.5644		420	22.2	23.5	25.2	32	32.2	31.8	10.9486	11.0446	10.8525		420	20.4	22	24.0206	23.8	24.3
440	20.2	14.9	24.3	40	40.4	39.6	15.2704	15.4624	15.0783		440	20.5	22.8	25.2	25.8	26.2	25.4	10.5644	10.7565	10.3723		440	21.9	23.6	24.8	26.4	26.8	26	10.7565	10.9486	10.5644		440	22	23.2	25.1	32.6	33	32.2	11.1406	11.3327	10.9486		440	20.3	22	23.8165	23.9	24.3
460	19.9	14.5	24.1	40.8	40.9	40.7	15.5585	15.8466	15.2704		460	20.4	22.6	25.2	25.9	26	25.8	10.6604	10.9486	10.3723		460	21.8	23.4	24.8	27.1	27.2	27	10.8525	11.1406	10.5644		460	21.8	22.9	25	33	33.1	32.9	11.3327	11.6208	11.0446		460	20.2	21.8	23.8206	24	24.5
480	19.6	14.3	23.7	41.5	41.8	41.2	15.8466	16.0387	15.6545		480	20.3	22.6	25	26	26.3	25.7	10.7565	10.9486	10.5644		480	21.7	23.4	24.6	27.7	28	27.4	10.9486	11.1406	10.7565		480	21.7	22.9	24.8	33.4	33.7	33.1	11.4288	11.6208	11.2367		480	20.1	21.6	23.8247	24.1	24.7
500	19.3	13.9	23.5	42.2	42.7	41.7	16.1347	16.4228	15.8466		500	20.1	22.3	24.9	26.3	26.8	25.8	10.9486	11.2367	10.6604		500	21.5	23.1	24.5	28.4	28.9	27.9	11.1406	11.4288	10.8525		500	21.5	22.6	24.7	33.8	34.3	33.3	11.6208	11.909	11.3327		500	19.9	21.3	23.7289	24.2	24.9
520	18.9	13.6	23	43	43.3	42.7	16.5189	16.711	16.3268		520	19.9	22.2	24.6	27.2	27.5	26.9	11.1406	11.3327	10.9486		520	21.3	23	24.2	29	29.3	28.7	11.3327	11.5248	11.1406		520	21.3	22.5	24.4	34.2	34.5	33.9	11.8129	12.005	11.6208		520	19.8	21.3	23.5247	24.4	25
540	18.5	13.3	22.5	43.9	44.1	43.7	16.903	16.9991	16.807		540	19.7	22.1	24.3	27.8	28	27.6	11.3327	11.4288	11.2367		540	21	22.8	23.8	29.6	29.8	29.4	11.6208	11.7169	11.5248		540	21	22.3	24	34.7	34.9	34.5	12.101	12.1971	12.005		540	19.7	21.3	23.3206	24.5	25
560	18.2	12.9	22.3	44.5	44.8	44.2	17.1912	17.3832	16.9991		560	19.6	21.9	24.3	28.2	28.5	27.9	11.4288	11.6208	11.2367		560	20.8	22.5	23.7	30.1	30.4	29.8	11.8129	12.005	11.6208		560	20.9	22.1	24	35.1	35.4	34.8	12.1971	12.3892	12.005		560	19.6	21.2	23.2206	25	25.5
580	17.9	12.5	22.1	45.2	45.6	44.8	17.4793	17.7674	17.1912		580	19.5	21.7	24.3	29	29.4	28.6	11.5248	11.8129	11.2367		580	20.5	22.1	23.5	30.7	31.1	30.3	12.101	12.3892	11.8129		580	20.8	21.9	24	35.6	36	35.2	12.2931	12.5812	12.005		580	19.5	21.2	23.0165	25.5	25.9
600	17.6	12.3	21.7	46	46.2	45.8	17.7674	17.9595	17.5753		600	19.3	21.6	24	29.5	29.7	29.3	11.7169	11.909	11.5248		600	20.2	21.9	23.1	31.1	31.3	30.9	12.3892	12.5812	12.1971		600	20.6	21.8	23.7	36	36.2	35.8	12.4852	12.6773	12.2931		600	19.4	21.2	22.8124	26	26.3
630	17	11.6	21.2	47	47.3	46.7	18.3436	18.6318	18.0555		630	19	21.2	23.8	30.3	30.6	30	12.005	12.2931	11.7169		630	20	21.6	23	31.8	32.1	31.5	12.5812	12.8694	12.2931		630	20.3	21.4	23.5	36.5	36.8	36.2	12.7733	13.0614	12.4852		630	19.2	21	22.6124	27	27.3
660	16.7		21	48.2		47.8	18.6318		18.2476		660	18.8	20.9	23.7	31.2	31.6	30.8	12.1971	12.5812	11.8129		660	19.8	21.3	22.9	32.5	32.9	32.1	12.7733	13.1575	12.3892		660	20	21	23.3	36.9	37.3	36.5	13.0614	13.4456	12.6773		660	19	20.7	22.5165	27.8	28.2
			20.6			49.1			18.6318		690	18.5	20.5	23.5	31.9	32.3	31.5	12.4852	12.9654	12.005		690	19.6	21	22.8	33.2	33.6	32.8	12.9654	13.4456	12.4852		690	19.7	20.6	23.1	37.4	37.8	37	13.3496	13.8298	12.8694		690	18.8	20.5	22.3165	28.7	29.1
											720	18.3	20.5	23.1	32.7	32.8	32.6	12.6773	12.9654	12.3892		720	19.3	20.9	22.3	33.8	33.9	33.7	13.2535	13.5416	12.9654		720	19.4	20.5	22.6	38	38.1	37.9	13.6377	13.9258	13.3496		720	18.7	20.3	22.3206	29.5	30
											750	18	20.3	22.7	33.5	33.8	33.2	12.9654	13.1575	12.7733		750	19.1	20.8	22	34.6	34.9	34.3	13.4456	13.6377	13.2535		750	19.1	20.3	22.2	38.5	38.8	38.2	13.9258	14.1179	13.7337		750	18.5	20.1	22.1206	30	30.5
											780	17.8	20.2	22.4	34.3	34.8	33.8	13.1575	13.2535	13.0614		780	18.9	20.7	21.7	35.2	35.7	34.7	13.6377	13.7337	13.5416		780	18.9	20.2	21.9	39	39.5	38.5	14.1179	14.2139	14.0218		780	18.3	20	21.8165	30.5	30.9
											810	17.5	19.8	22.2	35	35.3	34.7	13.4456	13.6377	13.2535		810	18.6	20.3	21.5	36	36.3	35.7	13.9258	14.1179	13.7337		810	18.7	19.9	21.8	39.7	40	39.4	14.31	14.502	14.1179		810	18.1	19.7	21.7206	31.1	31.6
											840	17.3	19.5	22.1	35.7	35.9	35.5	13.6377	13.9258	13.3496		840	18.4	20	21.4	36.8	37	36.6	14.1179	14.406	13.8298		840	18.4	19.5	21.6	40.2	40.4	40	14.5981	14.8862	14.31		840	17.9	19.7	21.3124	31.6	31.9
											870	17	19.3	21.7	36.5	36.8	36.2	13.9258	14.1179	13.7337		870	18.1	19.8	21	37.6	37.9	37.3	14.406	14.5981	14.2139		870	18.1	19.3	21.2	40.8	41.1	40.5	14.8862	15.0783	14.6941		870	17.8	19.5	21.3165	32.1	32.5
											900	16.8	19	21.6	37.4	37.8	37	14.1179	14.406	13.8298		900	17.8	19.4	20.8	38.3	38.7	37.9	14.6941	14.9822	14.406		900	17.8	18.9	21	41.4	41.8	41	15.1743	15.4624	14.8862		900	17.6	19.2	21.2206	32.6	33.1
											960	16.3	18.6	21	39	39.2	38.8	14.5981	14.7902	14.406		960	17.4	19.1	20.3	40	40.2	39.8	15.0783	15.2704	14.8862		960	17.2	18.4	20.3	42.5	42.7	42.3	15.7506	15.9426	15.5585		960	17.2	18.7	20.9247	33.5	34.1
											1020	15.8	18.2	20.4	40.5	40.8	40.2	15.0783	15.1743	14.9822		1020	16.9	18.7	19.7	41.3	41.6	41	15.5585	15.6545	15.4624		1020	16.7	18	19.7	43.7	44	43.4	16.2308	16.3268	16.1347		1020	17	18.4	20.8289	34.5	35.2
											1080	15.2	17.5	19.9	41.6	42	41.2	15.6545	15.8466	15.4624		1080	16.4	18.1	19.3	42.6	43	42.2	16.0387	16.2308	15.8466		1080	16.1	17.3	19.2	44.8	45.2	44.4	16.807	16.9991	16.6149		1080	16.7	18.2	20.4247	35.6	36.2
											1140	14.7	16.9	19.5	42.7	43	42.4	16.1347	16.4228	15.8466		1140	15.9	17.5	18.9	44	44.3	43.7	16.5189	16.807	16.2308		1140	15.6	16.7	18.8	46.1	46.4	45.8	17.2872	17.5753	16.9991		1140	16.4	18	20.0206	36.7	37.2
											1200	14.3	16.6	19	43.8	44.2	43.4	16.5189	16.711	16.3268		1200	15.3	17	18.2	45.8	46.2	45.4	17.0951	17.2872	16.903		1200	15	16.2	18.1	47.5	47.9	47.1	17.8634	18.0555	17.6714		1200	16.1	17.7	19.7206	37.6	38.1
											1260	13.8	16	18.6	44.9	45.1	44.7	16.9991	17.2872	16.711		1260	14.8	16.4	17.8	46.5	46.7	46.3	17.5753	17.8634	17.2872		1260	14.4	15.6	17.6	48.8	49	48.6	18.4397	18.6318	18.1516		1260	15.8	17.5	19.3165	38.5	38.9
											1320	13.2	15.3	18.1	46.2	46.5	45.9	17.5753	17.9595	17.1912		1320	14.3	15.6	17.4	47.6	47.9	47.3	18.0555	18.6318	17.6714		1290	14.2		17.5	49.5		49.2	18.6318		18.2476		1320	15.5	17.1	19.1206	39.5	40
											1380	12.7	14.6	17.7	47.3	47.6	47	18.0555	18.6318	17.5753		1380	13.7		16.9	48.6		48.3	18.6318		18.1516					17.1			49.9			18.6318		1380	14.9	16.4	18.6247	40.5	41.1
											1440	12.1		17	48.1		47.6	18.6318		18.2476					16.4			49.3			18.6318													1440	14.2	15.6	18.0289	41.3	42
														16.6			48.6			18.6318																								1500	13.9	15.4	17.6247	42	42.6
																																												1560	13.6	15.2	17.2206	42.8	43.3
																																												1620	13.3	14.9	16.9206	43.7	44.2
																																												1680	12.9	14.6	16.4165	44.5	44.9
																																												1740	12.6	14.4	16.0124	45.3	45.6
																																												1800	12.2	14	15.6124	46.1	46.4
																																												1860	11.9	13.6	15.4165	46.8	47.2
																																												1920	11.5	13.2	15.0165	47.5	47.9
																																												1980	11.2	12.8	14.8206	48.2	48.7
																																												2040	10.9	12.6	14.5206	48.9	49.4
																																												2100	10.5		14.2247	49.6
																																															13.6018
[truncated: 4 more columns]

## Sheet: dynamic distribution-1
Dynamic distribution of water and salt during infiltration
Treaments	CK-10cm						P6-10cm						P3-10cm						B3-10cm						S3-10cm
	Sample 1		Sample 2		Sample 3		Sample 1		Sample 2		Sample 3		Sample 1		Sample 2		Sample 3		Sample 1		Sample 2		Sample 3		Sample 1		Sample 2		Sample 3
Time（min）	soil water content(%)	EC (mS/cm)	soil water content(%)	EC (mS/cm)	soil water content(%)	EC (mS/cm)	soil water content(%)	EC (mS/cm)	soil water content(%)	EC (mS/cm)	soil water content(%)	EC (mS/cm)	soil water content(%)	EC (mS/cm)	soil water content(%)	EC (mS/cm)	soil water content(%)	EC (mS/cm)	soil water content(%)	EC (mS/cm)	soil water content(%)	EC (mS/cm)	soil water content(%)	EC (mS/cm)	soil water content(%)	EC (mS/cm)	soil water content(%)	EC (mS/cm)	soil water content(%)	EC (mS/cm)
0	3.2294	0	3.4294	0.01	3.0294	0	2.94243	0.01	3.14243	0.02	2.74243	0	2.8231	0	3.0231	0.01	2.6231	0	3.01031	0	3.21031	0.01	2.81031	0	2.87432	0.01	3.27432	0.02	2.47432	0
10	3.2629	0.01	3.3629	0.02	3.1629	0	3.02725	0.01	3.12725	0.02	2.92725	0	3.2629	0	3.5629	0.01	2.9629	0	3.29634	0	3.49634	0.01	3.09634	0	2.9764	0.01	3.1764	0.02	2.7764	0
20	3.44616	0.01	3.64616	0.02	3.24616	0.01	3.2629	0.01	3.4629	0.02	3.0629	0	6.24609	0	6.84609	0.01	5.64609	0.01	3.4793	0	4.6793	0.01	2.2793	0.1	3.07797	0.01	3.17797	0.02	2.97797	0
30	13.8879	0.01	15.5879	0.02	12.1879	0.01	6.24609	0.01	6.84609	0.02	5.64609	0	13.8879	0	15.0879	0.01	12.6879	0.01	4.03444	0	4.23444	0.01	3.83444	0.1	3.29634	0.01	4.59634	0.02	1.99634	0
40	21.8481	0.42	23.6481	0.47	20.0481	0.37	13.8879	3.45	14.7879	3.65	12.9879	3.25	21.8481	3.42	23.3481	3.62	20.3481	3.22	8.84346	0.42	10.3435	0.47	7.34346	0.37	5.59342	0.01	7.09342	0.02	4.09342	0
50	35.0983	4.43	37.1983	4.63	32.9983	4.23	21.8481	4.59	23.1481	4.79	20.5481	4.39	35.0983	4.43	36.3983	4.63	33.7983	4.23	13.7862	4.43	14.4862	4.63	13.0862	4.23	10.9738	1.01	12.5738	1.06	9.37382	0.96
60	36.2452	4.63	37.3452	4.93	35.1452	4.33	35.0983	5.23	37.3983	5.43	32.7983	5.03	36.2452	4.84	36.5452	5.14	35.9452	4.54	24.9137	4.63	26.7137	4.93	23.1137	4.33	16.2181	3.86	17.9181	3.96	14.5181	3.76
70	31.674	5.61	32.174	5.91	31.174	5.31	35.9484	6.11	36.4484	6.41	35.4484	5.81	31.674	5.89	32.174	6.19	31.174	5.59	33.9071	5.61	35.0071	5.91	32.8071	5.31	23.8745	4.03	24.9745	4.23	22.7745	3.83
80	24.4246	5.32	25.9246	5.62	22.9246	5.02	31.674	5.11	32.574	5.41	30.774	4.81	25.7514	4.82	27.1514	5.02	24.3514	4.62	27.7136	5.32	29.0136	5.62	26.4136	5.02	33.4425	4.77	34.7425	5.07	32.1425	4.47
90	20.4585	3.29	21.7585	3.49	19.1585	3.09	24.4246	4.23	26.5246	4.43	22.3246	4.03	22.388	3.93	23.688	4.08	21.088	3.78	21.2867	3.29	22.4867	3.49	20.0867	3.09	30.0676	5.52	31.2676	5.82	28.8676	5.22
100	17.4325	1.44	18.2325	1.54	16.6325	1.34	20.4585	2.62	21.0585	2.77	19.8585	2.47	19.1855	2.74	19.7855	2.84	18.5855	2.64	17.1983	2.2	17.7983	2.3	16.5983	2.1	25.5989	5.75	26.1989	6.05	24.9989	5.45
110	13.7716	0.97	14.1716	1.12	13.3716	0.82	17.4325	1.97	18.5325	2.07	16.3325	1.87	16.9058	1.96	18.0058	2.01	15.8058	1.91	14.5774	1.44	15.6774	1.59	13.4774	1.29	21.5445	4.84	23.1445	5.14	19.9445	4.54
120	13.3579	0.94	13.6579	1.04	13.0579	0.84	15.7451	1.89	16.1451	1.94	15.3451	1.84	15.249	1.86	15.749	1.9	14.749	1.82	13.3424	1.41	13.7424	1.46	12.9424	1.36	18.9225	3.22	19.9225	3.37	17.9225	3.07
150	12.865	0.92	13.065	0.93	12.665	0.91	15.2907	1.8	15.3907	1.81	15.1907	1.79	14.6037	1.68	14.9037	1.69	14.3037	1.67	12.4973	1.29	12.7973	1.3	12.1973	1.28	17.1937	1.62	17.7937	1.63	16.5937	1.61
180	12.3684	0.88	12.4684	0.91	12.2684	0.85	14.6495	1.7	14.8495	1.73	14.4495	1.67	13.9598	1.57	14.1598	1.6	13.7598	1.54	11.7421	1.19	11.9421	1.2	11.5421	1.18	16.5874	1.3	16.8874	1.33	16.2874	1.27
210	12.0336	0.84	12.2336	0.85	11.8336	0.83	13.9383	1.57	14.2383	1.58	13.6383	1.56	13.3192	1.42	13.6192	1.43	13.0192	1.41	11.2784	1.11	11.5784	1.13	10.9784	1.09	15.9588	1.13	16.1588	1.14	15.7588	1.12
240	11.8158	0.81	11.9158	0.83	11.7158	0.79	13.2647	1.45	13.3647	1.47	13.1647	1.43	12.758	1.29	13.058	1.3	12.458	1.28	11.0434	1.06	11.1434	1.07	10.9434	1.05	15.3145	1.03	15.5145	1.05	15.1145	1.01
270	11.6585	0.77	11.7585	0.78	11.5585	0.76	12.6747	1.35	12.9747	1.36	12.3747	1.34	12.325	1.22	12.425	1.23	12.225	1.21	10.9038	1	11.0038	1.01	10.8038	0.99	14.7466	0.95	15.0466	0.96	14.4466	0.94
300	11.5271	0.74	11.6271	0.75	11.4271	0.73	12.2289	1.27	12.3289	1.28	12.1289	1.26	12.0066	1.16	12.1066	1.17	11.9066	1.15	10.803	0.95	10.903	0.96	10.703	0.94	14.1645	0.88	14.3645	0.89	13.9645	0.87
330	11.4226	0.71	11.5226	0.72	11.3226	0.7	11.9525	1.2	12.0525	1.23	11.8525	1.17	11.7882	1.1	11.8882	1.13	11.6882	1.07	10.7421	0.91	10.8421	0.92	10.6421	0.9	13.7275	0.83	13.9275	0.86	13.5275	0.8
360	11.3363	0.69	11.4363	0.7	11.2363	0.68	11.7606	1.14	11.8606	1.15	11.6606	1.13	11.6305	1.05	11.7305	1.06	11.5305	1.04	10.7012	0.87	10.8012	0.89	10.6012	0.85	13.3347	0.78	13.4347	0.79	13.2347	0.77
390	11.2687	0.67	11.3687	0.7	11.1687	0.64	11.6118	1.09	11.7118	1.11	11.5118	1.07	11.4987	1	11.5987	1.02	11.3987	0.98	10.6603	0.83	10.7603	0.84	10.5603	0.82	12.995	0.75	13.195	0.77	12.795	0.73
420	11.2104	0.65	11.3104	0.66	11.1104	0.64	11.4892	1.04	11.5892	1.05	11.3892	1.03	11.3748	0.96	11.4748	0.97	11.2748	0.95	10.6295	0.79	10.7295	0.8	10.5295	0.78	12.7248	0.72	12.8248	0.73	12.6248	0.71
450	11.1713	0.63	11.2713	0.64	11.0713	0.62	11.3939	0.99	11.4939	1	11.2939	0.98	11.2784	0.92	11.3784	0.93	11.1784	0.91	10.6089	0.76	10.7089	0.77	10.5089	0.75	12.4888	0.69	12.6888	0.7	12.2888	0.68
480	11.1321	0.61	11.2321	0.62	11.0321	0.6	11.3074	0.95	11.4074	0.96	11.2074	0.94	11.2006	0.89	11.3006	0.9	11.1006	0.88	10.5882	0.73	10.6882	0.74	10.4882	0.72	12.3163	0.67	12.4163	0.68	12.2163	0.66
500	11.1125	0.6	11.2125	0.61	11.0125	0.59	11.2687	0.92	11.3687	0.94	11.1687	0.9	11.1615	0.87	11.2615	0.89	11.0615	0.85	10.5882	0.71	10.6882	0.73	10.4882	0.69	12.2201	0.66	12.3201	0.68	12.1201	0.64
560	11.1125	0.56	11.2125	0.57	11.0125	0.55	11.1713	0.85	11.2713	0.86	11.0713	0.84	11.073	0.8	11.173	0.81	10.973	0.79	10.5779	0.67	10.6779	0.68	10.4779	0.66	11.9796	0.62	12.0796	0.63	11.8796	0.61
620	11.0928	0.51	11.1928	0.52	10.9928	0.5	11.1026	0.79	11.2026	0.8	11.0026	0.78	11.0235	0.75	11.1235	0.76	10.9235	0.74	10.5675	0.63	10.6675	0.66	10.4675	0.6	11.8341	0.59	11.9341	0.6	11.7341	0.58
680	11.0928	0.47	11.1928	0.48	10.9928	0.46	11.1125	0.74	11.2125	0.75	11.0125	0.73	11.0037	0.7	11.1037	0.71	10.9037	0.69	10.5675	0.59	10.6675	0.61	10.4675	0.57	11.7328	0.57	11.8328	0.58	11.6328	0.56
740	11.0829	0.44	11.1829	0.45	10.9829	0.43	11.0928	0.69	11.1928	0.7	10.9928	0.68	10.9937	0.65	11.0937	0.66	10.8937	0.64	10.5779	0.55	10.6779	0.56	10.4779	0.54	11.6118	0.54	11.7118	0.55	11.5118	0.53
800	11.0829	0.43	11.1829	0.44	10.9829	0.42	11.0928	0.65	11.1928	0.68	10.9928	0.62	10.9937	0.61	11.0937	0.64	10.8937	0.58	10.5572	0.51	10.6572	0.52	10.4572	0.5	11.5836	0.51	11.6836	0.54	11.4836	0.48
860	11.0928	0.4	11.1928	0.43	10.9928	0.37	11.0829	0.6	11.1829	0.62	10.9829	0.58	11.0235	0.55	11.1235	0.57	10.9235	0.53	10.5468	0.47	10.6468	0.48	10.4468	0.46	11.5082	0.49	11.6082	0.51	11.4082	0.47
920	11.1125	0.38	11.2125	0.39	11.0125	0.37	11.0829	0.54	11.1829	0.55	10.9829	0.53	11.0235	0.5	11.1235	0.51	10.9235	0.49	10.5468	0.43	10.6468	0.44	10.4468	0.42	11.4512	0.47	11.5512	0.48	11.3512	0.46
980	11.1321	0.36	11.2321	0.37	11.0321	0.35	11.0928	0.49	11.1928	0.52	10.9928	0.46	11.0235	0.46	11.1235	0.49	10.9235	0.43	10.5468	0.42	10.6468	0.45	10.4468	0.39	11.4035	0.45	11.5035	0.48	11.3035	0.42
1040	11.1615	0.34	11.2615	0.35	11.0615	0.33	11.1125	0.46	11.2125	0.48	11.0125	0.44	11.0434	0.43	11.1434	0.45	10.9434	0.41	10.5572	0.39	10.6572	0.41	10.4572	0.37	11.3844	0.43	11.4844	0.45	11.2844	0.41
1100	11.1811	0.33	11.2811	0.34	11.0811	0.32	11.1321	0.42	11.2321	0.43	11.0321	0.41	11.073	0.4	11.173	0.41	10.973	0.39	10.5572	0.37	10.6572	0.38	10.4572	0.36	11.3556	0.41	11.4556	0.42	11.2556	0.4
1160	11.2006	0.39	11.3006	0.4	11.1006	0.38	11.1517	0.39	11.2517	0.4	11.0517	0.38	11.0928	0.37	11.1928	0.38	10.9928	0.36	10.5572	0.36	10.6572	0.39	10.4572	0.33	11.346	0.38	11.446	0.39	11.246	0.37
1220	11.1811	0.37	11.2811	0.38	11.0811	0.36	11.1811	0.37	11.2811	0.38	11.0811	0.36	11.1223	0.35	11.2223	0.36	11.0223	0.34	10.5675	0.34	10.6675	0.36	10.4675	0.32	11.3363	0.37	11.4363	0.38	11.2363	0.36
1280	11.1909	0.32	11.2909	0.33	11.0909	0.31	11.1909	0.35	11.2909	0.36	11.0909	0.34	11.1517	0.33	11.2517	0.34	11.0517	0.32	10.5675	0.33	10.6675	0.34	10.4675	0.32	11.3363	0.35	11.4363	0.36	11.2363	0.34
1340	11.1909	0.32	11.2909	0.33	11.0909	0.31	11.1909	0.33	11.2909	0.36	11.0909	0.3	11.1811	0.32	11.2811	0.35	11.0811	0.29	10.5675	0.31	10.6675	0.32	10.4675	0.3	11.3363	0.33	11.4363	0.36	11.2363	0.3
1400	11.1615	0.33	11.2615	0.35	11.0615	0.31	11.1615	0.31	11.2615	0.33	11.0615	0.29	11.1909	0.31	11.2909	0.32	11.0909	0.3	10.6089	0.31	10.7089	0.32	10.5089	0.3	11.2881	0.31	11.3881	0.33	11.1881	0.29
1460	11.1419	0.33	11.2419	0.34	11.0419	0.32	11.0928	0.31	11.1928	0.32	10.9928	0.3	11.073	0.3	11.173	0.31	10.973	0.29	10.6089	0.3	10.7089	0.31	10.5089	0.29	11.2687	0.3	11.3687	0.31	11.1687	0.29
1520	11.2299	0.33	11.3299	0.34	11.1299	0.32	11.0533	0.32	11.1533	0.35	10.9533	0.29	11.073	0.3	11.173	0.33	10.973	0.27	10.5985	0.3	10.6985	0.33	10.4985	0.27	11.2396	0.28	11.3396	0.31	11.1396	0.25
1580	11.2299	0.34	11.3299	0.36	11.1299	0.32	11.0335	0.32	11.1335	0.34	10.9335	0.3	11.0136	0.29	11.1136	0.31	10.9136	0.27	10.5882	0.31	10.6882	0.32	10.4882	0.3	11.259	0.27	11.359	0.29	11.159	0.25
1640	11.2201	0.34	11.3201	0.35	11.1201	0.33	10.9937	0.32	11.0937	0.33	10.8937	0.31	10.9339	0.29	11.0339	0.32	10.8339	0.26	10.5779	0.31	10.6779	0.32	10.4779	0.3	11.2493	0.25	11.3493	0.26	11.1493	0.24
1700	11.2201	0.34	11.3201	0.35	11.1201	0.33	10.8636	0.32	10.9636	0.33	10.7636	0.31	10.9738	0.29	11.0738	0.31	10.8738	0.27	10.5779	0.31	10.6779	0.34	10.4779	0.28	11.2784	0.24	11.3784	0.25	11.1784	0.23
1760	11.2977	0.34	11.3977	0.35	11.1977	0.33	10.9937	0.31	11.0937	0.32	10.8937	0.3	10.9339	0.29	11.0339	0.3	10.8339	0.28	10.5675	0.31	10.6675	0.34	10.4675	0.28	11.2977	0.23	11.3977	0.24	11.1977	0.22
1820	11.2881	0.34	11.3881	0.35	11.1881	0.33	10.9539	0.3	11.0539	0.31	10.8539	0.29	10.9138	0.28	11.0138	0.31	10.8138	0.25	10.5468	0.31	10.6468	0.33	10.4468	0.29	11.346	0.22	11.446	0.24	11.246	0.2
1880	11.2881	0.34	11.3881	0.37	11.1881	0.31	10.9239	0.28	11.0239	0.31	10.8239	0.25	10.8938	0.28	10.9938	0.3	10.7938	0.26	10.5365	0.31	10.6365	0.32	10.4365	0.3	11.3556	0.21	11.4556	0.22	11.2556	0.2
1940	11.2784	0.34	11.3784	0.36	11.1784	0.32	10.9038	0.27	11.0038	0.28	10.8038	0.26	10.8837	0.28	10.9837	0.29	10.7837	0.27	10.5365	0.32	10.6365	0.35	10.4365	0.29	11.3652	0.21	11.4652	0.22	11.2652	0.2
2000	11.2784	0.34	11.3784	0.35	11.1784	0.33	10.9038	0.27	11.0038	0.28	10.8038	0.26	10.8737	0.28	10.9737	0.29	10.7737	0.27	10.5261	0.32	10.6261	0.34	10.4261	0.3	11.3652	0.2	11.4652	0.22	11.2652	0.18
2060	11.2784	0.35	11.3784	0.38	11.1784	0.32	10.9038	0.26	11.0038	0.29	10.8038	0.23	10.8737	0.28	10.9737	0.29	10.7737	0.27	10.5261	0.32	10.6261	0.33	10.4261	0.31	11.3652	0.2	11.4652	0.21	11.2652	0.19
2120	11.2784	0.35	11.3784	0.37	11.1784	0.33	10.9038	0.26	11.0038	0.28	10.8038	0.24	10.8636	0.28	10.9636	0.29	10.7636	0.27	10.5261	0.32	10.6261	0.33	10.4261	0.31	11.3652	0.19	11.4652	0.2	11.2652	0.18
2180	11.2784	0.35	11.3784	0.36	11.1784	0.34	10.9038	0.26	11.0038	0.27	10.8038	0.25	10.8636	0.28	10.9636	0.31	10.7636	0.25	10.5261	0.32	10.6261	0.33	10.4261	0.31	11.3652	0.19	11.4652	0.2	11.2652	0.18
2240	11.2784	0.35	11.3784	0.36	11.1784	0.34	10.9038	0.25	11.0038	0.26	10.8038	0.24	10.8636	0.28	10.9636	0.3	10.7636	0.26	10.5261	0.32	10.6261	0.33	10.4261	0.31	11.3652	0.18	11.4652	0.19	11.2652	0.17
2300	11.2784	0.35	11.3784	0.36	11.1784	0.34	10.9038	0.25	11.0038	0.26	10.8038	0.24	10.8636	0.27	10.9636	0.28	10.7636	0.26	10.5261	0.33	10.6261	0.36	10.4261	0.3	11.3556	0.18	11.4556	0.21	11.2556	0.15
2360	11.2784	0.35	11.3784	0.36	11.1784	0.34	10.9038	0.25	11.0038	0.26	10.8038	0.24	10.8636	0.27	10.9636	0.3	10.7636	0.24	10.5261	0.33	10.6261	0.34	10.4261	0.32	11.3363	0.18	11.4363	0.2	11.2363	0.16
2420	11.2784	0.35	11.3784	0.38	11.1784	0.32	10.9038	0.25	11.0038	0.26	10.8038	0.24	10.8636	0.27	10.9636	0.29	10.7636	0.25	10.5261	0.33	10.6261	0.34	10.4261	0.32	11.3171	0.19	11.4171	0.2	11.2171	0.18
2480	11.2784	0.35	11.3784	0.37	11.1784	0.33	10.9038	0.25	11.0038	0.26	10.8038	0.24	10.8535	0.27	10.9535	0.28	10.7535	0.26	10.5261	0.33	10.6261	0.36	10.4261	0.3	11.3074	0.19	11.4074	0.22	11.2074	0.16
2540	11.2687	0.35	11.3687	0.36	11.1687	0.34	10.9038	0.25	11.0038	0.26	10.8038	0.24	10.8535	0.27	10.9535	0.28	10.7535	0.26	10.5261	0.33	10.6261	0.35	10.4261	0.31	11.3074	0.19	11.4074	0.21	11.2074	0.17
2600	11.2687	0.35	11.3687	0.38	11.1687	0.32	10.9038	0.24	11.0038	0.27	10.8038	0.21	10.8535	0.27	10.9535	0.28	10.7535	0.26	10.5261	0.34	10.6261	0.35	10.4261	0.33	11.2977	0.2	11.3977	0.21	11.1977	0.19
2660	11.2687	0.35	11.3687	0.37	11.1687	0.33	10.9038	0.24	11.0038	0.25	10.8038	0.23	10.8535	0.27	10.9535	0.28	10.7535	0.26	10.5261	0.33	10.6261	0.34	10.4261	0.32	11.2881	0.2	11.3881	0.21	11.1881	0.19
2720	11.2784	0.35	11.3784	0.36	11.1784	0.34	10.9138	0.24	11.0138	0.25	10.8138	0.23	10.8636	0.27	10.9636	0.28	10.7636	0.26	10.5157	0.34	10.6157	0.35	10.4157	0.33	11.2784	0.2	11.3784	0.21	11.1784	0.19
2780	11.2687	0.35	11.3687	0.36	11.1687	0.34	10.9138	0.24	11.0138	0.25	10.8138	0.23	10.8535	0.27	10.9535	0.28	10.7535	0.26	10.5157	0.33	10.6157	0.34	10.4157	0.32	11.2784	0.2	11.3784	0.21	11.1784	0.19
2840	11.2687	0.35	11.3687	0.36	11.1687	0.34	10.9038	0.24	11.0038	0.25	10.8038	0.23	10.8535	0.27	10.9535	0.28	10.7535	0.26	10.5157	0.33	10.6157	0.34	10.4157	0.32	11.2687	0.2	11.3687	0.23	11.1687	0.17
2900	11.2687	0.35	11.3687	0.36	11.1687	0.34	10.9038	0.24	11.0038	0.25	10.8038	0.23	10.8535	0.27	10.9535	0.28	10.7535	0.26	10.5157	0.33	10.6157	0.34	10.4157	0.32	11.2687	0.2	11.3687	0.22	11.1687	0.18
3000	11.2687	0.36	11.3687	0.39	11.1687	0.33	10.9138	0.24	11.0138	0.27	10.8138	0.21	10.8535	0.27	10.9535	0.29	10.7535	0.25	10.5157	0.34	10.6157	0.36	10.4157	0.32	11.2396	0.2	11.3396	0.21	11.1396	0.19
3100	11.2687	0.36	11.3687	0.37	11.1687	0.35	10.9138	0.24	11.0138	0.25	10.8138	0.23	10.8535	0.26	10.9535	0.27	10.7535	0.25	10.5157	0.34	10.6157	0.35	10.4157	0.33	11.2299	0.21	11.3299	0.22	11.1299	0.2
3200	11.2687	0.36	11.3687	0.38	11.1687	0.34	10.9138	0.24	11.0138	0.25	10.8138	0.23	10.8535	0.26	10.9535	0.27	10.7535	0.25	10.5157	0.34	10.6157	0.35	10.4157	0.33	11.2201	0.21	11.3201	0.22	11.1201	0.2
3300	11.2687	0.36	11.3687	0.37	11.1687	0.35	10.9038	0.24	11.0038	0.25	10.8038	0.23	10.8434	0.26	10.9434	0.29	10.7434	0.23	10.5157	0.34	10.6157	0.35	10.4157	0.33	11.2006	0.21	11.3006	0.22	11.1006	0.2
3400	11.2687	0.36	11.3687	0.37	11.1687	0.35	10.9038	0.24	11.0038	0.27	10.8038	0.21	10.8434	0.26	10.9434	0.28	10.7434	0.24	10.5157	0.34	10.6157	0.36	10.4157	0.32	11.2104	0.21	11.3104	0.24	11.1104	0.18
3500	11.2687	0.36	11.3687	0.37	11.1687	0.35	10.9138	0.24	11.0138	0.25	10.8138	0.23	10.8535	0.26	10.9535	0.27	10.7535	0.25	10.5157	0.35	10.6157	0.36	10.4157	0.34	11.2006	0.21	11.3006	0.23	11.1006	0.19
3600	11.2687	0.36	11.3687	0.38	11.1687	0.34	10.9239	0.23	11.0239	0.24	10.8239	0.22	10.8434	0.26	10.9434	0.27	10.7434	0.25	10.5157	0.34	10.6157	0.35	10.4157	0.33	11.1909	0.21	11.2909	0.22	11.0909	0.2
3700	11.2687	0.36	11.3687	0.37	11.1687	0.35	10.9339	0.23	11.0339	0.24	10.8339	0.22	10.8535	0.26	10.9535	0.29	10.7535	0.23	10.5157	0.34	10.6157	0.35	10.4157	0.33	11.1909	0.21	11.2909	0.22	11.0909	0.2
3800	11.2687	0.36	11.3687	0.37	11.1687	0.35	10.9339	0.23	11.0339	0.25	10.8339	0.21	10.8535	0.26	10.9535	0.28	10.7535	0.24	10.5157	0.34	10.6157	0.37	10.4157	0.31	11.1811	0.21	11.2811	0.24	11.0811	0.18
3900	11.2687	0.36	11.3687	0.39	11.1687	0.33	10.9339	0.22	11.0339	0.23	10.8339	0.21	10.8535	0.26	10.9535	0.27	10.7535	0.25	10.5157	0.34	10.6157	0.35	10.4157	0.33	11.1811	0.21	11.2811	0.22	11.0811	0.2
4000	11.2687	0.36	11.3687	0.38	11.1687	0.34	10.9339	0.22	11.0339	0.23	10.8339	0.21	10.8434	0.26	10.9434	0.27	10.7434	0.25	10.5157	0.34	10.6157	0.35	10.4157	0.33	11.1713	0.21	11.2713	0.22	11.0713	0.2
4100	11.2687	0.36	11.3687	0.37	11.1687	0.35	10.9439	0.21	11.0439	0.22	10.8439	0.2	10.8636	0.26	10.9636	0.27	10.7636	0.25	10.5157	0.35	10.6157	0.36	10.4157	0.34	11.1811	0.21	11.2811	0.22	11.0811	0.2
4200	11.2687	0.36	11.3687	0.37	11.1687	0.35	10.9439	0.21	11.0439	0.23	10.8439	0.19	10.8636	0.26	10.9636	0.28	10.7636	0.24	10.5157	0.34	10.6157	0.37	10.4157	0.31	11.1811	0.21	11.2811	0.22	11.0811	0.2
4300	10.803	0.36	10.903	0.39	10.703	0.33	10.9339	0.21	11.0339	0.22	10.8339	0.2	10.8737	0.26	10.9737	0.27	10.7737	0.25	10.5468	0.34	10.6468	0.35	10.4468	0.33	11.3267	0.21	11.4267	0.22	11.2267	0.2
4400	10.9138	0.37	11.0138	0.39	10.8138	0.35	10.9838	0.2	11.0838	0.21	10.8838	0.19	10.7624	0.25	10.8624	0.26	10.6624	0.24	10.5365	0.34	10.6365	0.35	10.4365	0.33	11.3748	0.21	11.4748	0.23	11.2748	0.19
4500	10.9138	0.37	11.0138	0.38	10.8138	0.36	11.0037	0.19	11.1037	0.2	10.9037	0.18	10.7624	0.25	10.8624	0.26	10.6624	0.24	10.5365	0.34	10.6365	0.36	10.4365	0.32	11.3748	0.21	11.4748	0.22	11.2748	0.2
4600	10.9239	0.37	11.0239	0.38	10.8239	0.36	11.0136	0.19	11.1136	0.22	10.9136	0.16	10.7827	0.25	10.8827	0.28	10.6827	0.22	10.5468	0.35	10.6468	0.36	10.4468	0.34	11.3267	0.21	11.4267	0.22	11.2267	0.2
4700	10.9138	0.37	11.0138	0.4	10.8138	0.34	11.0235	0.18	11.1235	0.19	10.9235	0.17	10.9239	0.24	11.0239	0.25	10.8239	0.23	10.5468	0.34	10.6468	0.35	10.4468	0.33	11.6585	0.21	11.7585	0.22	11.5585	0.2
4800	10.4845	0.37	10.5845	0.38	10.3845	0.36	10.8636	0.17	10.9636	0.18	10.7636	0.16	10.9339	0.24	11.0339	0.25	10.8339	0.23	10.5468	0.34	10.6468	0.37	10.4468	0.31	11.6399	0.21	11.7399	0.22	11.5399	0.2
4900	10.4845	0.37	10.5845	0.38	10.3845	0.36	10.8535	0.16	10.9535	0.17	10.7535	0.15	10.9239	0.24	11.0239	0.25	10.8239	0.23	10.5468	0.34	10.6468	0.36	10.4468	0.32	11.6399	0.21	11.7399	0.24	11.5399	0.18
5000	10.4845	0.37	10.5845	0.38	10.3845	0.36	10.8434	0.15	10.9434	0.18	10.7434	0.12	10.9239	0.23	11.0239	0.24	10.8239	0.22	10.5468	0.34	10.6468	0.35	10.4468	0.33	11.6399	0.21	11.7399	0.23	11.5399	0.19
5100	10.4636	0.37	10.5636	0.38	10.3636	0.36	10.8434	0.15	10.9434	0.16	10.7434	0.14	10.9239	0.23	11.0239	0.25	10.8239	0.21	10.5468	0.35	10.6468	0.36	10.4468	0.34	11.6399	0.21	11.7399	0.22	11.5399	0.2
5200	10.4636	0.37	10.5636	0.38	10.3636	0.36	10.8333	0.15	10.9333	0.16	10.7333	0.14	10.9239	0.23	11.0239	0.24	10.8239	0.22	10.5468	0.34	10.6468	0.37	10.4468	0.31	11.6399	0.21	11.7399	0.22	11.5399	0.2
5300	10.4636	0.37	10.5636	0.39	10.3636	0.35	10.8333	0.15	10.9333	0.16	10.7333	0.14	10.9239	0.23	11.0239	0.24	10.8239	0.22	10.5468	0.35	10.6468	0.37	10.4468	0.33	11.6305	0.21	11.7305	0.24	11.5305	0.18
5400	10.4636	0.37	10.5636	0.38	10.3636	0.36	10.8333	0.15	10.9333	0.18	10.7333	0.12	10.9239	0.23	11.0239	0.26	10.8239	0.2	10.5468	0.35	10.6468	0.36	10.4468	0.34	11.6305	0.21	11.7305	0.22	11.5305	0.2
5500	10.4636	0.37	10.5636	0.38	10.3636	0.36	10.8333	0.15	10.9333	0.16	10.7333	0.14	10.9239	0.23	11.0239	0.25	10.8239	0.21	10.5468	0.35	10.6468	0.36	10.4468	0.34	11.6211	0.21	11.7211	0.22	11.5211	0.2

## Sheet: water evaporation test
water evaporation test
		CK										P6										P3										B3										S3
Date	Day	Marriotte’s bottle (cm)			Cumulative evaporation (mL)			Daily evaporation (mL)				Marriotte’s bottle (cm)			Cumulative evaporation (mL)			Daily evaporation (mL)				Marriotte’s bottle (cm)			Cumulative evaporation (mL)			Daily evaporation (mL)				Marriotte’s bottle (cm)			Cumulative evaporation (mL)			Daily evaporation (mL)				Marriotte’s bottle (cm)			Cumulative evaporation (mL)			Daily evaporation (mL)
		Sample 1	Sample 2	Sample 3	Sample 1	Sample 2	Sample 3	Sample 1	Sample 2	Sample 3		Sample 1	Sample 2	Sample 3	Sample 1	Sample 2	Sample 3	Sample 1	Sample 2	Sample 3		Sample 1	Sample 2	Sample 3	Sample 1	Sample 2	Sample 3	Sample 1	Sample 2	Sample 3		Sample 1	Sample 2	Sample 3	Sample 1	Sample 2	Sample 3	Sample 1	Sample 2	Sample 3		Sample 1	Sample 2	Sample 3	Sample 1	Sample 2	Sample 3	Sample 1	Sample 2
6.2	0	17.1	19	20								25.8	30	27.5								17.1	36.5	32								17.1	28.5	25.6								17.1	19	21.5	0
6.21	1	22.9	25.8	24.8	132.765	155.656	109.875	132.765	155.656	109.875		29.5	34.7	30.2	84.6952	107.586	61.8046	84.6952	107.586	61.8046		21.5	41.9	35.4	100.719	123.609	77.828	100.719	123.609	77.828		22.3	34.7	29.8	119.031	141.922	96.1405	119.031	141.922	96.1405		22.5	25.4	25.9	123.609	146.5	100.719	123.609	146.5
6.22	2	26.9	29.3	29.3	224.328	235.773	212.883	91.5624	80.1171	103.008		32.1	37.3	32.8	144.211	167.101	121.32	59.5156	59.5156	59.5156		22.4	42.8	36.3	121.32	144.211	98.4296	20.6015	20.6015	20.6015		23.8	35.7	31.8	153.367	164.812	141.922	34.3359	22.8906	45.7812		23	25.4	26.9	135.055	146.5	123.609	11.4453	0
6.23	3	30.9	33.1	33.5	315.89	322.757	309.023	91.5624	86.9843	96.1405		32.6	37.4	33.8	155.656	169.39	144.211	11.4453	2.28906	22.8906		22.9	42.9	37.3	132.765	146.5	121.32	11.4453	2.28906	22.8906		24.8	36.5	33	176.258	183.125	169.39	22.8906	18.3125	27.4687		23.4	25.4	27.7	144.211	146.5	141.922	9.15624	0
6.24	4	35.2	37.4	37.8	414.32	421.187	407.453	98.4296	98.4296	98.4296		33	37.5	34.4	164.812	171.68	157.945	9.15624	2.28906	13.7344		23.4	43.1	38	144.211	151.078	137.344	11.4453	4.57812	16.0234		26	37.7	34.2	203.726	210.594	196.859	27.4687	27.4687	27.4687		23.8	25.8	28.1	153.367	155.656	151.078	9.15624	9.15624
6.25	5	39.2	41.2	42.1	505.882	508.171	505.882	91.5624	86.9843	98.4296		33.5	37.8	35.1	176.258	178.547	173.969	11.4453	6.86718	16.0234		23.9	43.4	38.7	155.656	157.945	153.367	11.4453	6.86718	16.0234		27.2	38.7	35.6	231.195	233.484	228.906	27.4687	22.8906	32.0468		24.1	26.1	28.4	160.234	162.523	157.945	6.86718	6.86718
6.26	6	42.9	45	45.6	590.577	595.156	585.999	84.6952	86.9843	80.1171		33.7	38.1	35.2	180.836	185.414	176.258	4.57812	6.86718	2.28906		24.3	43.9	39	164.812	169.39	160.234	9.15624	11.4453	6.86718		28.6	40.2	36.9	263.242	267.82	258.664	32.0468	34.3359	29.7578		24.5	26.6	28.7	169.39	173.969	164.812	9.15624	11.4453
6.27	7	46.6	48.7	49.3	675.273	679.851	670.695	84.6952	84.6952	84.6952		33.9	38.4	35.3	185.414	192.281	178.547	4.57812	6.86718	2.28906		24.8	44.4	39.5	176.258	180.836	171.68	11.4453	11.4453	11.4453		30.5	42.1	38.8	306.734	311.312	302.156	43.4921	43.4921	43.4921		25	27.1	29.2	180.836	185.414	176.258	11.4453	11.4453
6.28	8	50	52.2	52.6	753.101	759.968	746.234	77.828	80.1171	75.539		34.2	38.7	35.6	192.281	199.148	185.414	6.86718	6.86718	6.86718		25.4	45.1	40	189.992	196.859	183.125	13.7344	16.0234	11.4453		32.7	44.4	40.9	357.093	363.961	350.226	50.3593	52.6484	48.0703		25.2	27.4	29.3	185.414	192.281	178.547	4.57812	6.86718
6.29	9	53.5	55.7	56.1	833.218	840.085	826.351	80.1171	80.1171	80.1171		34.7	39.1	36.2	203.726	208.304	199.148	11.4453	9.15624	13.7344		26	45.9	40.4	203.726	215.172	192.281	13.7344	18.3125	9.15624		34.8	46.5	43	405.164	412.031	398.296	48.0703	48.0703	48.0703		25.7	27.8	29.9	196.859	201.437	192.281	11.4453	9.15624
6.3	10	56.7	58.7	59.5126	906.468	908.757	904.468	73.2499	68.6718	78.1171		35.4	39.7	37	219.75	222.039	217.461	16.0234	13.7344	18.3125		26.9	46.6	41.5	224.328	231.195	217.461	20.6015	16.0234	25.1797		36.8	48.3	45.2	450.945	453.234	448.656	45.7812	41.2031	50.3593		26.5	28.7	30.6	215.172	222.039	208.304	18.3125	20.6015
7.1	11	60	62	62.8	982.007	984.296	979.718	75.539	75.539	75.2499		36.1	40.4	37.7	235.773	238.062	233.484	16.0234	16.0234	16.0234		27.9	47.4	42.7	247.218	249.508	244.929	22.8906	18.3125	27.4687		38.7	50.2	47.1	494.437	496.726	492.148	43.4921	43.4921	43.4921		27.1	29.1	31.4	228.906	231.195	226.617	13.7344	9.15624
7.2	12	63.2	65.3	65.9	1055.26	1059.83	1050.68	73.2499	75.539	70.9609		37	41.4	38.5	256.375	260.953	251.797	20.6015	22.8906	18.3125		29.1	48.7	43.8	274.687	279.265	270.109	27.4687	29.7578	25.1797		40.4	52	48.7	533.351	537.929	528.773	38.914	41.2031	36.625		27.9	30	32.1	247.218	251.797	242.64	18.3125	20.6015
7.3	13	66	68.4	68.4	1119.35	1130.8	1107.91	64.0937	70.9609	57.2265		38.3	43	39.5	286.132	297.578	274.687	29.7578	36.625	22.8906		30.9	50.4	45.7	315.89	318.179	313.601	41.2031	38.914	43.4921		42.8	54.7	50.8	588.288	599.734	576.843	54.9374	61.8046	48.0703		28.4	30.4	32.7	258.664	260.953	256.375	11.4453	9.15624
7.4	14	68.4	70.5	71.1	1174.29	1178.87	1169.71	54.9374	48.0703	61.8046		39.5	43.9	41	313.601	318.179	309.023	27.4687	20.6015	34.3359		32.6	52.2	47.3	354.804	359.382	350.226	38.914	41.2031	36.625		45.4	57	53.7	647.804	652.382	643.226	59.5156	52.6484	66.3827		28.8	30.9	33	267.82	272.398	263.242	9.15624	11.4453
7.5	15	71.4	73.6	74	1242.96	1249.83	1236.09	68.6718	70.9609	66.3827		40.8	45.3	42.2	343.359	350.226	336.492	29.7578	32.0468	27.4687		34.4	54.1	49	396.007	402.875	389.14	41.2031	43.4921	38.914		47.9	59.6	56.1	705.03	711.898	698.163	57.2265	59.5156	54.9374		29.3	31.3	33.6	279.265	281.554	276.976	11.4453	9.15624
7.6	16	73.4	75.4	76.2	1288.74	1291.03	1286.45	45.7812	41.2031	50.3593		42.1	46.5	43.6	373.117	377.695	368.539	29.7578	27.4687	32.0468		36.3	55.8	51.1	439.5	441.789	437.21	43.4921	38.914	48.0703		50.5	62	58.9	764.546	766.835	762.257	59.5156	54.9374	64.0937		29.5	31.5	33.8	283.843	286.133	281.554	4.57812	4.57812
7.7	17	75.2	77.3	77.9	1329.94	1334.52	1325.37	41.2031	43.4921	38.914		43.2	47.6	44.7	398.296	402.875	393.718	25.1797	25.1797	25.1797		39	58.6	53.7	501.304	505.882	496.726	61.8046	64.0937	59.5156		53.2	64.8	61.5	826.351	830.929	821.773	61.8046	64.0937	59.5156		29.9	32	34.1	293	297.578	288.422	9.15624	11.4453
7.8	18	77	79.2	79.5	1371.15	1378.01	1361.99	41.2031	43.4921	36.625		44.4	48.9	45.8	425.765	432.632	418.898	27.4687	29.7578	25.1797		41.1	60.6	55.9	549.374	551.663	547.085	48.0703	45.7812	50.3593		55.6	67.3	63.8	881.288	888.155	874.421	54.9374	57.2265	52.6484		30.2	32.2	34.5	299.867	302.156	297.578	6.86718	4.57812
7.9	19	78.6	80.6	81.4	1407.77	1410.06	1405.48	36.625	32.0468	43.4921		45.7	50	47.3	455.523	457.812	453.234	29.7578	25.1797	34.3359		43.5	63	58.3	604.312	606.601	602.023	54.9374	54.9374	54.9374		58	69.5	66.4	936.226	938.515	933.936	54.9374	50.3593	59.5156		30.5	32.5	34.8	306.734	309.023	304.445	6.86718	6.86718
7.1	20	80.9	83.1	83.5	1460.42	1467.29	1453.55	52.6484	57.2265	48.0703		46.9	51.4	48.3	482.992	489.859	476.124	27.4687	32.0468	22.8906		45.6	65.3	60.2	652.382	659.249	645.515	48.0703	52.6484	43.4921		60.4	72.1	68.6	991.163	998.03	984.296	54.9374	59.5156	50.3593		30.9	32.9	35.2	315.89	318.179	313.601	9.15624	9.15624
7.11	21	82.5	84.5	85.3	1497.05	1499.33	1494.76	36.625	32.0468	41.2031		48.1	52.4	49.7	510.46	512.749	508.171	27.4687	22.8906	32.0468		47.7	67.4	62.3	700.452	707.32	693.585	48.0703	48.0703	48.0703		62.89	74.4	71.3	1048.16	1050.68	1046.1	56.9976	52.6484	61.8046		31.3	33.4	35.5	325.047	329.625	320.468	9.15624	11.4453
7.12	22	83.9	85.9	86.7	1529.09	1531.38	1526.8	32.0468	32.0468	32.0468		49.2	53.6	50.7	535.64	540.218	531.062	25.1797	27.4687	22.8906		49.7	69.3	64.5	746.234	750.812	743.945	45.7812	43.4921	50.3593		65.19	76.7	73.6	1100.81	1103.33	1098.75	52.6484	52.6484	52.6484		31.7	33.7	36	334.203	336.492	331.914	9.15624	6.86718
7.13	23	85.4	87.5	88.1	1563.43	1568.01	1558.85	34.3359	36.625	32.0468		50.6	55.1	52	567.687	574.554	560.82	32.0468	34.3359	29.7578		51.5	71.1	66.3	787.437	792.015	785.148	41.2031	41.2031	41.2031		67.69	79.3	76	1158.04	1162.84	1153.69	57.2265	59.5156	54.9374		31.9	34	36.1	338.781	343.359	334.203	4.57812	6.86718
7.14	24	86.9	89.1	89.5	1597.76	1604.63	1590.9	34.3359	36.625	32.0468		51.9	56.4	53.3	597.445	604.312	590.577	29.7578	29.7578	29.7578		53.6	73.3	68.2	835.507	842.374	828.64	48.0703	50.3593	43.4921		70.49	82.2	78.7	1222.13	1229.23	1215.49	64.0937	66.3827	61.8046		32.3	34.3	36.6	347.937	350.226	345.648	9.15624	6.86718
7.15	25	88.7	90.7	91.5	1638.97	1641.26	1636.68	41.2031	36.625	45.7812		53.2	57.5	54.8	627.202	629.492	624.913	29.7578	25.1797	34.3359		55.2	74.4	70	872.132	867.554	869.843	36.625	25.1797	41.2031		72.89	84.4	81.3	1277.07	1279.58	1275.01	54.9374	50.3593	59.5156		32.6	34.6	36.9	354.804	357.093	352.515	6.86718	6.86718
[truncated: 1 more columns]

## Sheet: dynamic distribution-2
Dynamic distribution of water content during evaporation																	Dynamic distribution of salt concentation during evaporation
soil water content (%)																	EC (mS/cm)
Treaments	CK-10cm			P6-10cm			P3-10cm			B3-10cm			S3-10cm				Treaments	CK-10cm			P6-10cm			P3-10cm			B3-10cm			S3-10cm
Day	Sample 1	Sample 2	Sample 3	Sample 1	Sample 2	Sample 3	Sample 1	Sample 2	Sample 3	Sample 1	Sample 2	Sample 3	Sample 1	Sample 2	Sample 3		Day	Sample 1	Sample 2	Sample 3	Sample 1	Sample 2	Sample 3	Sample 1	Sample 2	Sample 3	Sample 1	Sample 2	Sample 3	Sample 1	Sample 2	Sample 3
0	9.8847	10.0847	9.6847	10.9239	10.8239	11.0239	10.8434	10.7434	10.9434	10.5468	10.6468	10.4468	11.6118	11.7118	11.6118		0	0.41	0.36	0.46	0.32	0.27	0.37	0.15	0.1	0.2	0.35	0.4	0.3	0.21	0.16	0.26
1	10.5985	10.7985	10.3985	10.9339	10.6339	11.2339	10.6808	10.3808	10.9808	10.4949	10.7949	10.1949	11.259	11.559	11.259		1	0.41	0.36	0.46	0.32	0.27	0.37	0.19	0.14	0.24	0.35	0.4	0.3	0.18	0.13	0.23
2	10.3481	10.6481	10.0481	9.943	9.543	10.343	9.6525	9.2525	10.0525	10.3797	10.7797	9.9797	10.1673	10.2673	10.1673		2	0.4	0.35	0.45	0.33	0.28	0.38	0.18	0.13	0.23	0.34	0.39	0.29	0.21	0.16	0.26
3	10.5675	10.6675	10.4675	9.4948	9.3948	9.5948	8.6754	8.1754	9.1754	10.1673	10.2673	10.0673	9.7195	10.0195	9.7195		3	0.55	0.5	0.6	0.29	0.24	0.34	0.19	0.14	0.24	0.34	0.39	0.29	0.26	0.21	0.31
4	10.5779	10.8779	10.2779	8.9229	8.6229	9.2229	7.9561	7.6561	8.2561	9.8082	10.1082	9.5082	9.15	9.55	9.15		4	0.61	0.56	0.66	0.25	0.2	0.3	0.18	0.13	0.23	0.31	0.36	0.26	0.24	0.19	0.29
5	10.5675	10.6675	10.4675	8.3452	8.2452	8.4452	7.7252	7.6252	7.8252	9.686	9.786	9.586	8.8673	8.9673	8.8673		5	0.7	0.65	0.75	0.23	0.18	0.28	0.17	0.12	0.22	0.31	0.36	0.26	0.23	0.18	0.28
6	10.7522	10.9522	10.5522	7.4775	7.1775	7.7775	7.9689	7.6689	8.2689	9.6413	9.9413	9.3413	8.4193	8.7193	8.4193		6	0.82	0.77	0.87	0.22	0.17	0.27	0.16	0.11	0.21	0.32	0.37	0.27	0.22	0.17	0.27
7	11.1713	11.2713	11.0713	7.2656	7.1656	7.3656	7.7123	7.6123	7.8123	9.7083	9.8083	9.6083	8.2458	8.3458	8.2458		7	0.98	0.88	1.08	0.21	0.16	0.26	0.15	0.1	0.2	0.35	0.4	0.3	0.21	0.16	0.26
8	12.6496	12.8496	12.4496	7.0777	6.6777	7.4777	7.5431	7.1431	7.9431	9.9728	10.3728	9.5728	8.6027	8.7027	8.6027		8	1.21	1.11	1.31	0.21	0.16	0.26	0.15	0.1	0.2	0.39	0.44	0.34	0.2	0.15	0.25
9	15.678	16.478	14.878	6.9149	6.7149	7.1149	7.5038	7.2038	7.8038	10.1994	10.3994	9.9994	8.4316	8.6316	8.4316		9	1.57	1.37	1.77	0.21	0.16	0.26	0.15	0.1	0.2	0.46	0.51	0.41	0.2	0.15	0.25
10	18.952	19.852	18.052	6.9149	6.6149	7.2149	7.53	7.43	7.63	10.2952	10.5952	9.9952	8.308	8.608	8.308		10	2.17	1.87	2.47	0.21	0.16	0.26	0.15	0.1	0.2	0.54	0.59	0.49	0.19	0.14	0.24
11	19.6419	19.8419	19.4419	6.9965	6.7965	7.1965	7.6604	7.5604	7.7604	10.3797	10.5797	10.1797	8.1834	8.3834	8.1834		11	3.05	2.65	3.45	0.22	0.17	0.27	0.16	0.11	0.21	0.61	0.66	0.56	0.19	0.14	0.24
12	20.3123	20.6123	20.0123	7.1451	6.8451	7.4451	7.8668	7.5668	8.1668	10.4531	10.7531	10.1531	8.0702	8.3702	8.0702		12	3.9	3.6	4.2	0.24	0.19	0.29	0.18	0.13	0.23	0.69	0.74	0.64	0.19	0.14	0.24
13	20.8139	20.9139	20.7139	6.9012	6.8012	7.0012	7.8668	7.7668	7.9668	10.4217	10.5217	10.3217	7.5954	7.6954	7.5954		13	4.17	4.07	4.27	0.25	0.2	0.3	0.2	0.15	0.25	0.77	0.82	0.72	0.18	0.13	0.23
14	22.551	23.251	21.851	7.1854	6.8854	7.4854	8.3823	8.0823	8.6823	10.5365	10.8365	10.2365	7.4906	7.7906	7.4906		14	5.18	4.78	5.58	0.28	0.23	0.33	0.24	0.19	0.29	0.91	1.01	0.81	0.18	0.13	0.23
15	24.7391	25.0391	24.4391	7.5038	7.2038	7.8038	9.1383	8.8383	9.4383	10.9638	11.2638	10.6638	7.4116	7.5116	7.4116		15	5.97	5.67	6.27	0.31	0.26	0.36	0.32	0.27	0.37	1.12	1.22	1.02	0.18	0.13	0.23
16	25.7514	25.8514	25.6514	7.764	7.664	7.864	9.7306	9.3306	10.1306	11.3997	11.4997	11.2997	7.3321	7.4321	7.3321		16	6.39	6.19	6.59	0.35	0.3	0.4	0.41	0.36	0.46	1.43	1.53	1.33	0.18	0.13	0.23
17	26.2029	26.7029	25.7029	8.007	7.507	8.507	10.2528	9.7528	10.7528	12.2468	12.7468	11.7468	6.8465	7.0465	6.8465		17	6.59	6.39	6.79	0.38	0.33	0.43	0.5	0.45	0.55	1.88	2.08	1.68	0.18	0.13	0.23
18	26.4771	26.8771	26.0771	8.2334	7.8334	8.6334	10.8232	10.4232	11.2232	14.1604	14.5604	13.7604	7.3188	7.4188	7.3188		18	6.66	6.56	6.76	0.42	0.37	0.47	0.6	0.55	0.65	2.19	2.24	2.14	0.18	0.13	0.23
19	26.8414	27.1414	26.5414	9.2748	8.9748	9.5748	11.593	11.093	12.093	15.6711	16.3711	14.9711	7.3798	7.5798	7.3798		19	6.74	6.64	6.84	0.46	0.41	0.51	0.7	0.65	0.75	2.59	2.79	2.39	0.18	0.13	0.23
20	27.2835	27.4835	27.0835	10.3815	9.7815	10.9815	12.6244	12.0244	13.2244	17.078	17.678	16.478	8.0008	8.1008	8.0008		20	6.84	6.74	6.94	0.5	0.45	0.55	0.8	0.75	0.85	3.15	3.45	2.85	0.18	0.13	0.23
21	28.4777	28.6777	28.2777	11.4965	11.2965	11.6965	14.0452	13.3452	14.7452	18.5303	18.7303	18.3303	8.3342	8.5342	8.3342		21	6.99	6.89	7.09	0.54	0.49	0.59	0.93	0.83	1.03	3.47	3.62	3.32	0.18	0.13	0.23
22	29.6255	29.8255	29.4255	12.067	11.867	12.267	15.4669	15.2669	15.6669	19.9593	20.5593	19.3593	8.8695	8.9695	8.8695		22	7.22	7.12	7.32	0.57	0.52	0.62	1.08	0.98	1.18	3.98	4.18	3.78	0.18	0.13	0.23
23	29.8047	29.9047	29.7047	12.8576	12.3576	13.3576	16.3314	16.0314	16.6314	20.3963	20.6963	20.0963	9.002	9.102	9.002		23	7.33	7.13	7.53	0.59	0.54	0.64	1.23	1.13	1.33	4.46	4.66	4.26	0.18	0.13	0.23
24	30.3606	30.4606	30.2606	13.8469	13.7469	13.9469	17.4769	16.6769	18.2769	21.5598	22.0598	21.0598	8.9625	9.0625	8.9625		24	7.44	7.24	7.64	0.65	0.6	0.7	1.42	1.32	1.52	4.96	5.11	4.81	0.18	0.13	0.23
25	31.0067	31.3067	30.7067	15.5333	14.8333	16.2333	18.7206	18.0206	19.4206	23.3907	24.0907	22.6907	9.4756	9.6756	9.4756		25	7.7	7.4	8	0.72	0.67	0.77	1.61	1.46	1.76	5.45	5.65	5.25	0.18	0.13	0.23

## Sheet: soil water content
Soil water concentration after phreatic evaporation
soil water content (%)
Treaments	soil depth (cm)	Sample 1	Sample 2	Sample 3
CK-1	5cm	34.39	31.99	33.1898
CK-2	15cm	31.25	32.45	31.8526
CK-3	25cm	32.64	34.24	33.4431
CK-4	35cm	36.04	32.84	34.4421
CK-5	45cm	31.32	33.52	32.4245
P6-1	5cm	12.24	15.04	13.6389
P6-2	15cm	20.69	18.09	19.3899
P6-3	25cm	30.32	32.72	31.5193
P6-4	35cm	33.7	32.7	33.2049
P6-5	45cm	31.75	33.55	32.6466
P3-1	5cm	17.25	16.45	16.8517
P3-2	15cm	18.98	22.58	20.7839
P3-3	25cm	35.05	32.65	33.8532
P3-4	35cm	35.77	33.17	34.4668
P3-5	45cm	31.2	32.6	31.9032
B3-1	5cm	22.1651	23.5651	22.8651
B3-2	15cm	26.6604	24.0604	25.3604
B3-3	25cm	31.9513	34.9513	33.4513
B3-4	35cm	35.9404	31.7404	33.8404
B3-5	45cm	30.5696	31.7696	31.1696
S3-1	5cm	8.1103	6.5103	7.3103
S3-2	15cm	11.4866	13.8866	12.6866
S3-3	25cm	33.6262	32.4262	33.0262
S3-4	35cm	31.2177	34.6177	32.9177
S3-5	45cm	30.8509	26.8509	28.8509

## Sheet: soil salt content
Soil salt concentration after phreatic evaporation
soil salt content (g/kg)
Treaments	soil depth (cm)	Sample 1	Sample 2	Sample 3
CK-1	5cm	28.56	25.64	27.1981
CK-2	15cm	7.93	9.33	8.62857
CK-3	25cm	3.53	4.73	4.12727
CK-4	35cm	4.77	3.77	4.26536
CK-5	45cm	2.79	2.01	2.38715
P6-1	5cm	0.82	1.02	0.924976
P6-2	15cm	1.96	1.56	1.76213
P6-3	25cm	16.17	13.77	14.9733
P6-4	35cm	14.07	16.67	15.3696
P6-5	45cm	4.66	5.86	5.25649
P3-1	5cm	5.36	4.15	4.74772
P3-2	15cm	7.49	8.89	8.19013
P3-3	25cm	15.36	12.96	14.1554
P3-4	35cm	5.57	7.37	6.47347
P3-5	45cm	2.63	3.43	3.03112
B3-1	5cm	17.36	15.16	16.2602
B3-2	15cm	14.18	16.18	15.177
B3-3	25cm	6.71	5.31	6.00899
B3-4	35cm	4.45	5.45	4.95314
B3-5	45cm	1.98	2.38	2.1803
S3-1	5cm	0.53	0.33	0.432414
S3-2	15cm	0.93	0.73	0.831942
S3-3	25cm	5.53	5.33	5.42615
S3-4	35cm	15.28	15.08	15.185
S3-5	45cm	16.4	18.4	17.3991

## Sheet: Distribution of Na+ and Cl–
Distribution of Na+ and Cl– in the soil profile of different treatments
		Na+ (g/kg)			Cl- (g/kg)
Treaments	soil depth (cm)	Sample 1	Sample 2	Sample 3	Sample 1	Sample 2	Sample 3
CK-1	5cm	7.03	6.17	6.59642	0.75	0.97	0.860307
CK-2	15cm	2.16	2.76	2.4597	0.32	0.22	0.265261
CK-3	25cm	1.54	2.14	1.8367	0.09	0.11	0.0985768
CK-4	35cm	1.75	1.35	1.55012	0.07	0.09	0.0752768
CK-5	45cm	1.41	1.81	1.61242	0.09	0.07	0.0818486
P6-1	5cm	0.29	0.39	0.341498	0.01	0.03	0.0179231
P6-2	15cm	0.59	0.79	0.690377	0.05	0.03	0.0424179
P6-3	25cm	5.19	4.39	4.78972	0.43	0.51	0.471974
P6-4	35cm	4.05	4.65	4.35362	0.57	0.43	0.501846
P6-5	45cm	2.24	1.64	1.93638	0.13	0.12	0.112318
P3-1	5cm	1.3	1.1	1.20124	0.1	0.12	0.11172
P3-2	15cm	2.26	1.96	2.11082	0.27	0.25	0.263469
P3-3	25cm	4.46	5.26	4.86	0.46	0.4	0.430153
P3-4	35cm	2.21	1.81	2.01	0.09	0.13	0.110526
P3-5	45cm	1.84	2.04	1.94	0.06	0.08	0.0728871
B3-1	5cm	3.18	3.78	3.48	0.42	0.58	0.501846
B3-2	15cm	4.65	4.05	4.35362	0.61	0.43	0.519769
B3-3	25cm	2.29	1.99	2.13574	0.14	0.15	0.133228
B3-4	35cm	1.46	1.76	1.61242	0.1	0.08	0.0860307
B3-5	45cm	1.53	1.33	1.42552	0.06	0.08	0.0734845
S3-1	5cm	0.08	0.18	0.129678	0.01	0.01	0.00776666
S3-2	15cm	0.25	0.35	0.304117	0.01	0.01	0.0125461
S3-3	25cm	1.97	1.57	1.7744	0.14	0.12	0.129046
S3-4	35cm	4.78	4.18	4.47822	0.55	0.45	0.501846
S3-5	45cm	3.99	4.59	4.29132	0.48	0.6	0.537692

## Sheet: Conductivity of interlayer
Conductivity of interlayer material before and after evaporation (uS/cm)
before evaporation
materials	Sample 1	Sample 2	Sample 3
straw	340	382	361
peat	20	28	24
biochar	60	61	61
after evaporation
S3	378	367	372
P6	719	205	721
P3	256	719	717
B3	241	252	255
